# Supplementary material for: Gut and Colony Microbiota of Honey Bees Apis mellifera: Social Immunity, Opportunistic Disease and Survival Overwinter.
Source: Research Square preprint supplement (doi:10.21203/rs.3.rs-757584/v1), 2021-08-09
Supplement: Supplementary file 1 [file c808ff4289a26089fe50724e.xlsx]

## Sheet: _xltb_storage_
XL Toolbox Settings
	export_preset	<?xml version="1.0" encoding="utf-16"?>_x000D_ <Preset xmlns:xsd="http://www.w3.org/2001/XMLSchema" xmlns:xsi="http://www.w3.org/2001/XMLSchema-instance">_x000D_ <Name>Png, 1200 dpi, RGB, Transparent canvas</Name>_x000D_ <Dpi>1200</Dpi>_x000D_ <FileType>Png</FileType>_x000D_ <ColorSpace>Rgb</ColorSpace>_x000D_ <Transparency>TransparentCanvas</Transparency>_x000D_ <UseColorProfile>false</UseColorP…
	export_path	C:\Users\Owner\Desktop\OW\OW ABS 98%\Fig 3- Expression_Known Age.png

## Sheet: Hymenoptaecin
Anderson and Maes 2021, Gut and Colony Microbiota of Honey Bees Overwinter: Longevity Phenotypes, Social Immunity and Opportunistic Disease.
Table S4. Hymenoptaecin expression in the hypopharyngeal gland overwinter
Day month year	Sample set	Marked or random	Early/Mid/Late Winter	Normalized Hym Expression	log(Norm Hym Exp)		KA samples											CW samples									WW samples
2015-12-22	KA samples	19 Days old	Early	35.9788	1.55605
2015-12-22	KA samples	19 Days old	Early	0.0168418	-1.77361		Oneway Analysis of log(Norm Hym Exp) By Age (Days)											Oneway Analysis of log(Norm Hym Exp) By Early/Late									Oneway Analysis of log(Norm Hym Exp) By Early/Late
2015-12-22	KA samples	19 Days old	Early	7.68045	0.885387
2015-12-22	KA samples	19 Days old	Early	0.218006	-0.661531
2015-12-22	KA samples	19 Days old	Early	0.0224696	-1.64841
2015-12-22	KA samples	19 Days old	Early	0.0998382	-1.0007		Nonparametric Comparisons For All Pairs Using Steel-Dwass Method											Quantiles									Quantiles
2015-12-22	KA samples	19 Days old	Early	0.00948188	-2.02311
2015-12-22	KA samples	19 Days old	Early	0.0058221	-2.23492		q*	Alpha										Level	Minimum	0.1	0.25	Median	0.75	0.9	Maximum		Level	Minimum	0.1	0.25	Median	0.75	0.9	Maximum
2015-12-22	KA samples	19 Days old	Early	0.00746674	-2.12687		2.56903	0.05										Late	-2.84147	-2.69494	-2.52894	-2.19891	-1.53263	-0.18462	1.68954		Late	-2.8356	-2.6902	-2.27688	-2.01327	-1.372	1.35067	1.37477
2015-12-22	KA samples	19 Days old	Early	0.00297475	-2.52655													Early	-2.45621	-2.42108	-2.20089	-1.78935	-0.77721	0.714669	0.79439		Early	-2.32016	-2.27423	-1.99056	-1.20516	-0.51396	0.192939	0.692707
2015-12-22	KA samples	19 Days old	Early	0.0245669	-1.60965
2016-01-05	KA samples	19 Days old	Early	0.222237	-0.653183
2016-01-05	KA samples	33 Days old	Mid	0.0398211	-1.39989		Level	- Level	Score Mean Difference	Std Err Dif	Z	p-Value	Hodges-Lehmann	Lower CL	Upper CL
2016-01-05	KA samples	33 Days old	Mid	0.623958	-0.204845		50	33	5.91667	2.88675	2.04959	0.17	1.71819	-1.01554	3.12565	+++++
2016-01-05	KA samples	33 Days old	Mid	1.04183	0.0177974		50	19	5.41667	2.88675	1.87639	0.2382	1.91904	-0.63824	3.34256	++++++		Wilcoxon / Kruskal-Wallis Tests (Rank Sums)									Wilcoxon / KrusKA samplesl-Wallis Tests (Rank Sums)
2016-01-05	KA samples	33 Days old	Mid	0.231455	-0.635534		70	19	5.225	2.78039	1.87923	0.237	1.12699	-0.69986	3.51208	+++
2016-01-05	KA samples	33 Days old	Mid	0.0152721	-1.8161		70	33	4.49167	2.78039	1.61548	0.3698	0.89861	-1.11489	3.09326	+++		Level	Count	Score Sum	Expected Score	Score Mean	(Mean-Mean0)/Std0				Level	Count	Score Sum	Expected Score	Score Mean	(Mean-Mean0)/Std0
2016-01-05	KA samples	33 Days old	Mid	99.2552	1.99675		33	19	2.41667	2.88675	0.83716	0.8368	0.31048	-1.09023	1.6152	+		Late	18	254	288	14.1111	-1.341				Late	15	201	240	13.4	-1.522
2016-01-05	KA samples	33 Days old	Mid	0.0218519	-1.66051		70	50	-0.825	2.78039	-0.29672	0.9909	-0.26057	-2.80915	2.49762	-		Early	13	242	208	18.6154	1.341				Early	16	295	256	18.4375	1.522
2016-01-05	KA samples	33 Days old	Mid	0.00490186	-2.30964
2016-01-05	KA samples	33 Days old	Mid	0.0344022	-1.46341
2016-01-05	KA samples	33 Days old	Mid	0.69437	-0.158409		Excluded Rows	64
2016-01-05	KA samples	33 Days old	Mid	0.0250255	-1.60162
2016-01-22	KA samples	33 Days old	Mid	0.0124519	-1.90476		KA samples											2-Sample Test, Normal Approximation									2-Sample Test, Normal Approximation
2016-01-22	KA samples	50 Days old	Mid	1.98959	0.298764
2016-01-22	KA samples	50 Days old	Mid	0.00147354	-2.83164		Oneway Analysis of log(Norm Hym Exp) By Early/Late											S	Z	Prob>|Z|							S	Z	Prob>|Z|
2016-01-22	KA samples	50 Days old	Mid	0.00162635	-2.78879													242	1.34107	0.1799							201	-1.52185	0.128
2016-01-22	KA samples	50 Days old	Mid	0.0522733	-1.28172
2016-01-22	KA samples	50 Days old	Mid	16.9084	1.2281
2016-01-22	KA samples	50 Days old	Mid	2.08942	0.320026		Quantiles
2016-01-22	KA samples	50 Days old	Mid	1.76663	0.247147
2016-01-22	KA samples	50 Days old	Mid	124.038	2.09355		Level	Minimum	0.1	0.25	Median	0.75	0.9	Maximum				1-Way Test, ChiSquare Approximation									1-Way Test, ChiSquare Approximation
2016-01-22	KA samples	50 Days old	Mid	2728.08	3.43586		Late	-2.83164	-2.48087	-1.42354	0.346636	1.34739	2.85133	3.43586
2016-01-22	KA samples	50 Days old	Mid	6.54657	0.816014		Early	-2.52655	-2.27228	-1.8826	-1.53252	-0.31252	1.22072	1.99675				ChiSquare	DF	Prob>ChiSq							ChiSquare	DF	Prob>ChiSq
2016-01-22	KA samples	50 Days old	Mid	14.9324	1.17413													1.8526	1	0.1735							2.3766	1	0.1232
2016-01-22	KA samples	50 Days old	Mid	36.1458	1.55806
2016-02-11	KA samples	70 Days old	Mid	749.679	2.87488
2016-02-11	KA samples	70 Days old	Late	0.0172816	-1.76242
2016-02-11	KA samples	70 Days old	Late	0.023173	-1.63502		Wilcoxon / Kruskal-Wallis Tests (Rank Sums)
2016-02-11	KA samples	70 Days old	Late	1.20165	0.0797793													Missing Rows	1								Missing Rows	1
2016-02-11	KA samples	70 Days old	Late	625.732	2.79639		Level	Count	Score Sum	Expected Score	Score Mean	(Mean-Mean0)/Std0						Excluded Rows	78								Excluded Rows	78
2016-02-11	KA samples	70 Days old	Late	0.044356	-1.35305		Late	22	640	517	29.0909	2.694
2016-02-11	KA samples	70 Days old	Late	18.9305	1.27716		Early	24	441	564	18.375	-2.694
2016-02-11	KA samples	70 Days old	Late	0.0177655	-1.75042
2016-02-11	KA samples	70 Days old	Late	8.64754	0.936893
2016-02-11	KA samples	70 Days old	Late	2.36181	0.373246
2015-10-19	CW samples	random in-hive	Early	0.0165851	-1.78028
2015-10-19	CW samples	random in-hive	Early	0.0704035	-1.15241		2-Sample Test, Normal Approximation
2015-10-19	CW samples	random in-hive	Early	6.2286	0.79439
2015-10-19	CW samples	random in-hive	Early	0.00628839	-2.20146		S	Z	Prob>|Z|
2015-10-19	CW samples	random in-hive	Early	0.046675	-1.33092		640	2.69377	0.0071
2015-10-19	CW samples	random in-hive	Early	0.00630483	-2.20033
2015-10-19	CW samples	random in-hive	Early	0.0162424	-1.78935
2015-10-19	CW samples	random in-hive	Early
2015-10-19	CW samples	random in-hive	Early	0.00783935	-2.10572
2015-10-19	CW samples	random in-hive	Early	3.93629	0.595087		1-Way Test, ChiSquare Approximation
2015-10-19	CW samples	random in-hive	Early	0.396261	-0.402019
2015-10-19	CW samples	random in-hive	Early	0.00428173	-2.36838		ChiSquare	DF	Prob>ChiSq
2015-10-19	CW samples	random in-hive	Early	0.00670676	-2.17349		7.3158	1	0.0068
2016-02-10	CW samples	random in-hive	Late	0.109244	-0.961602
2016-02-10	CW samples	random in-hive	Late	0.0215054	-1.66745
2016-02-10	CW samples	random in-hive	Late	0.0241342	-1.61737		Excluded Rows	64
2016-02-10	CW samples	random in-hive	Late	0.00277265	-2.55711
2016-02-10	CW samples	random in-hive	Late	0.00298437	-2.52515
2016-02-10	CW samples	random in-hive	Late	0.0170095	-1.76931
2016-02-10	CW samples	random in-hive	Late	0.00352894	-2.45236
2016-02-10	CW samples	random in-hive	Late	0.00296066	-2.52861
2016-02-10	CW samples	random in-hive	Late	0.404707	-0.39286
2016-02-10	CW samples	random in-hive	Late	0.00608113	-2.21602
2016-02-10	CW samples	random in-hive	Late	0.0371891	-1.42958
2016-02-10	CW samples	random in-hive	Late	0.00545268	-2.26339
2016-02-10	CW samples	random in-hive	Late	0.00657952	-2.18181
2016-02-10	CW samples	random in-hive	Late	0.0271034	-1.56698
2016-02-10	CW samples	random in-hive	Late	0.00144056	-2.84147
2016-02-10	CW samples	random in-hive	Late	0.00295182	-2.52991
2016-02-10	CW samples	random in-hive	Late	0.00209578	-2.67865
2016-02-10	CW samples	random in-hive	Late	48.9264	1.68954
2016-02-10	CW samples	random in-hive	Late	0.00349779	-2.45621
2015-11-13	WW samples	random in-hive	Early	0.594258	-0.226025
2015-11-13	WW samples	random in-hive	Early	0.00478451	-2.32016
2015-11-13	WW samples	random in-hive	Early	0.355544	-0.449107
2015-11-13	WW samples	random in-hive	Early	0.0301944	-1.52007
2015-11-13	WW samples	random in-hive	Early	0.195643	-0.708536
2015-11-13	WW samples	random in-hive	Early	0.0101618	-1.99303
2015-11-13	WW samples	random in-hive	Early	0.177265	-0.751378
2015-11-13	WW samples	random in-hive	Early	4.92841	0.692707
2015-11-13	WW samples	random in-hive	Early	0.0087628	-2.05736
2015-11-13	WW samples	random in-hive	Early	0.0522061	-1.28228
2015-11-13	WW samples	random in-hive	Early	0.117628	-0.929489
2015-11-13	WW samples	random in-hive	Early	0.00556484	-2.25455
2015-11-13	WW samples	random in-hive	Early	0.952253	-0.0212476
2015-11-13	WW samples	random in-hive	Early	0.0744665	-1.12804
2015-11-13	WW samples	random in-hive	Early	0.0266822	-1.57378
2015-11-13	WW samples	random in-hive	Early	0.0103952	-1.98317
2016-02-19	WW samples	random in-hive	Late	0.00255116	-2.59326
2016-02-19	WW samples	random in-hive	Late	21.6075	1.3346
2016-02-19	WW samples	random in-hive	Late	0.00969905	-2.01327
2016-02-19	WW samples	random in-hive	Late	0.00146017	-2.8356
2016-02-19	WW samples	random in-hive	Late	23.7011	1.37477
2016-02-19	WW samples	random in-hive	Late
2016-02-19	WW samples	random in-hive	Late	0.012488	-1.90351
2016-02-19	WW samples	random in-hive	Late	0.0321153	-1.49329
2016-02-19	WW samples	random in-hive	Late	0.0424617	-1.372
2016-02-19	WW samples	random in-hive	Late	0.00695381	-2.15778
2016-02-19	WW samples	random in-hive	Late	0.622875	-0.205599
2016-02-19	WW samples	random in-hive	Late	0.00706098	-2.15113
2016-02-19	WW samples	random in-hive	Late	0.00528595	-2.27688
2016-02-19	WW samples	random in-hive	Late	0.0133495	-1.87454
2016-02-19	WW samples	random in-hive	Late	0.00644232	-2.19096
2016-02-19	WW samples	random in-hive	Late	0.00491265	-2.30868

## Sheet: Defensin-1
Anderson and Maes 2021, Gut and Colony Microbiota of Honey Bees Overwinter: Longevity Phenotypes, Social Immunity and Opportunistic Disease.
Table S4. Defensin-1 expression in the hypopharyngeal gland overwinter
Day month year	Sample set	Marked or random	Early/Mid/Late Winter	Normalized Def1 Expression	log(Norm Def1 Exp)			KA samples											CW samples									WW samples
2015-12-22	KA samples	19 Days old	Early	454.174	2.65722
2015-12-22	KA samples	19 Days old	Early	90.1496	1.95496			Oneway Analysis of log(Norm Def1 Exp) By Age (Days)											Oneway Analysis of log(Norm Def1 Exp) By Early/Late									Oneway Analysis of log(Norm Def1 Exp) By Early/Late
2015-12-22	KA samples	19 Days old	Early	23.9051	1.37849
2015-12-22	KA samples	19 Days old	Early	342.912	2.53518
2015-12-22	KA samples	19 Days old	Early	32.3276	1.50957														Quantiles
2015-12-22	KA samples	19 Days old	Early	451.656	2.65481			Quantiles																				Quantiles
2015-12-22	KA samples	19 Days old	Early	250.738	2.39922														Level	Minimum	0.1	0.25	Median	0.75	0.9	Maximum
2015-12-22	KA samples	19 Days old	Early	104.77	2.02024			Level	Minimum	0.1	0.25	Median	0.75	0.9	Maximum				Late	0.924654	1.00933	1.25959	1.55265	2.07231	2.39117	2.4322		Level	Minimum	0.1	0.25	Median	0.75	0.9	Maximum
2015-12-22	KA samples	19 Days old	Early	47.7852	1.67929			19	1.35549	1.36239	1.552	1.9876	2.50119	2.6565	2.65722				Early	1.23612	1.34889	1.68274	1.98089	2.4399	2.85381	2.94324		Late	0.653896	0.846168	1.42735	1.75029	2.07284	2.53068	3.29174
2015-12-22	KA samples	19 Days old	Early	54.7966	1.73875			33	1.21142	1.21866	1.34933	2.13844	2.49437	2.66347	2.69874													Early	1.09216	1.32032	1.68959	2.02124	2.37986	2.63479	2.66911
2015-12-22	KA samples	19 Days old	Early	213.465	2.32933			50	0.90296	1.06344	1.54639	1.94161	2.3447	3.09875	3.35818
2015-12-22	KA samples	19 Days old	Early	22.6722	1.35549			70	0.020488	0.117815	1.39695	1.90075	2.15435	2.63641	2.66774
2016-01-05	KA samples	33 Days old	Mid	19.0559	1.28003
2016-01-05	KA samples	33 Days old	Mid	17.2014	1.23556														Wilcoxon / Kruskal-Wallis Tests (Rank Sums)
2016-01-05	KA samples	33 Days old	Mid	381.224	2.58118																							Wilcoxon / Kruskal-Wallis Tests (Rank Sums)
2016-01-05	KA samples	33 Days old	Mid	211.544	2.3254														Level	Count	Score Sum	Expected Score	Score Mean	(Mean-Mean0)/Std0
2016-01-05	KA samples	33 Days old	Mid	16.2711	1.21142			Nonparametric Comparisons For All Pairs Using Steel-Dwass Method											Late	18	233	288	12.9444	-2.182				Level	Count	Score Sum	Expected Score	Score Mean	(Mean-Mean0)/Std0
2016-01-05	KA samples	33 Days old	Mid	499.739	2.69874														Early	13	263	208	20.2308	2.182				Late	16	220.5	264	13.7813	-1.621
2016-01-05	KA samples	33 Days old	Mid	90.0572	1.95452			q*	Alpha																			Early	16	307.5	264	19.2188	1.621
2016-01-05	KA samples	33 Days old	Mid	36.0752	1.55721			2.56903	0.05
2016-01-05	KA samples	33 Days old	Mid	55.2453	1.7423
2016-01-05	KA samples	33 Days old	Mid	233.156	2.36765
2016-01-05	KA samples	33 Days old	Mid	344.043	2.53661														2-Sample Test, Normal Approximation
2016-01-05	KA samples	33 Days old	Mid	210.069	2.32236			Level	- Level	Score Mean Difference	Std Err Dif	Z	p-Value	Hodges-Lehmann	Lower CL	Upper CL												2-Sample Test, Normal Approximation
2016-01-22	KA samples	50 Days old	Mid	7.9976	0.90296			33	19	-0.75	2.88675	-0.259808	0.9939	-0.069674	-0.74021	0.678506	-		S	Z	Prob>|Z|
2016-01-22	KA samples	50 Days old	Mid	38.3103	1.58332			50	19	-0.75	2.88675	-0.259808	0.9939	-0.100429	-0.79525	0.670923	-		263	2.18175	0.0291							S	Z	Prob>|Z|
2016-01-22	KA samples	50 Days old	Mid	132.745	2.12302			50	33	-0.75	2.88675	-0.259808	0.9939	-0.112779	-0.78829	0.777004	-											307.5	1.62077	0.1051
2016-01-22	KA samples	50 Days old	Mid	71.9121	1.8568			70	50	-1.55833	2.78039	-0.560473	0.9437	-0.085601	-1.27053	0.562927	-
2016-01-22	KA samples	50 Days old	Mid	27.4088	1.43789			70	19	-1.74167	2.78039	-0.626411	0.9236	-0.224537	-1.03176	0.491244	--
2016-01-22	KA samples	50 Days old	Mid	106.272	2.02642			70	33	-1.925	2.78039	-0.692349	0.9001	-0.239776	-1.07329	0.630156	--
2016-01-22	KA samples	50 Days old	Mid	34.204	1.53408														1-Way Test, ChiSquare Approximation
2016-01-22	KA samples	50 Days old	Mid	260.718	2.41617																							1-Way Test, ChiSquare Approximation
2016-01-22	KA samples	50 Days old	Mid	2281.31	3.35818			Excluded Rows	63										ChiSquare	DF	Prob>ChiSq
2016-01-22	KA samples	50 Days old	Mid	311.467	2.49341														4.8478	1	0.0277							ChiSquare	DF	Prob>ChiSq
2016-01-22	KA samples	50 Days old	Mid	43.2571	1.63606			Oneway Analysis of log(Norm Def1 Exp) By Early/Late																				2.6883	1	0.1011
2016-01-22	KA samples	50 Days old	Mid	134.988	2.1303
2016-02-11	KA samples	70 Days old	Late	226.181	2.35446
2016-02-11	KA samples	70 Days old	Late	69.4341	1.84157																							Excluded Rows	77
2016-02-11	KA samples	70 Days old	Late	100.188	2.00082			Quantiles
2016-02-11	KA samples	70 Days old	Late	42.2141	1.62546
2016-02-11	KA samples	70 Days old	Late	465.31	2.66774			Level	Minimum	0.1	0.25	Median	0.75	0.9	Maximum
2016-02-11	KA samples	70 Days old	Late	9.85729	0.993757			Late	0.020488	0.930199	1.5334	1.90836	2.18634	2.61544	3.35818
2016-02-11	KA samples	70 Days old	Late	122.364	2.08765			Early	1.21142	1.2578	1.52148	1.9876	2.50119	2.65602	2.69874
2016-02-11	KA samples	70 Days old	Late	33.99	1.53135
2016-02-11	KA samples	70 Days old	Late	91.1848	1.95992
2016-02-11	KA samples	70 Days old	Late	1.04831	0.0204883
2015-10-19	CW samples	random in-hive	Early	73.3128	1.86518
2015-10-19	CW samples	random in-hive	Early	249.151	2.39646			Wilcoxon / Kruskal-Wallis Tests (Rank Sums)
2015-10-19	CW samples	random in-hive	Early	112.807	2.05234
2015-10-19	CW samples	random in-hive	Early	304.33	2.48335			Level	Count	Score Sum	Expected Score	Score Mean	(Mean-Mean0)/Std0
2015-10-19	CW samples	random in-hive	Early	62.4139	1.79528			Late	22	486	517	22.0909	-0.671
2015-10-19	CW samples	random in-hive	Early	77.9939	1.89206			Early	24	595	564	24.7917	0.671
2015-10-19	CW samples	random in-hive	Early	877.491	2.94324
2015-10-19	CW samples	random in-hive	Early	37.1701	1.57019
2015-10-19	CW samples	random in-hive	Early	524.4	2.71966
2015-10-19	CW samples	random in-hive	Early	95.6942	1.98089
2015-10-19	CW samples	random in-hive	Early	17.2233	1.23612			2-Sample Test, Normal Approximation
2015-10-19	CW samples	random in-hive	Early	183.397	2.26339
2016-02-10	CW samples	random in-hive	Late	130.988	2.11723			S	Z	Prob>|Z|
2016-02-10	CW samples	random in-hive	Late	270.523	2.4322			486	-0.67069	0.5024
2016-02-10	CW samples	random in-hive	Late	114.114	2.05734
2016-02-10	CW samples	random in-hive	Late	25.6527	1.40913
2016-02-10	CW samples	random in-hive	Late	68.6828	1.83685
2016-02-10	CW samples	random in-hive	Late	243.564	2.38661
2016-02-10	CW samples	random in-hive	Late	8.40725	0.924654			1-Way Test, ChiSquare Approximation
2016-02-10	CW samples	random in-hive	Late	16.1639	1.20855
2016-02-10	CW samples	random in-hive	Late	18.9063	1.27661			ChiSquare	DF	Prob>ChiSq
2016-02-10	CW samples	random in-hive	Late	27.7167	1.44274			0.4647	1	0.4954
2016-02-10	CW samples	random in-hive	Late	203.334	2.30821
2016-02-10	CW samples	random in-hive	Late	45.978	1.66255
2016-02-10	CW samples	random in-hive	Late	61.8348	1.79123			Excluded Rows	63
2016-02-10	CW samples	random in-hive	Late	10.4408	1.01873
2016-02-10	CW samples	random in-hive	Late	53.8494	1.73118
2016-02-10	CW samples	random in-hive	Late	15.4129	1.18788
2016-02-10	CW samples	random in-hive	Late	24.4758	1.38874
2016-02-10	CW samples	random in-hive	Late	25.6035	1.4083
2016-02-10	CW samples	random in-hive	Late	32.9653	1.51806
2016-11-13	WW samples	random in-hive	Early	55.3459	1.74309
2016-11-13	WW samples	random in-hive	Early	12.364	1.09216
2016-11-13	WW samples	random in-hive	Early	185.128	2.26747
2016-11-13	WW samples	random in-hive	Early	261.408	2.41732
2016-11-13	WW samples	random in-hive	Early	65.1267	1.81376
2016-11-13	WW samples	random in-hive	Early	74.9671	1.87487
2016-11-13	WW samples	random in-hive	Early	34.4818	1.53759
2016-11-13	WW samples	random in-hive	Early	134.466	2.12861
2016-11-13	WW samples	random in-hive	Early	46.9637	1.67176
2016-11-13	WW samples	random in-hive	Early	138.359	2.14101
2016-11-13	WW samples	random in-hive	Early	26.1877	1.4181
2016-11-13	WW samples	random in-hive	Early	90.6552	1.95739
2016-11-13	WW samples	random in-hive	Early	466.781	2.66911
2016-11-13	WW samples	random in-hive	Early	299.56	2.47648
2016-11-13	WW samples	random in-hive	Early	416.942	2.62008
2016-11-13	WW samples	random in-hive	Early	121.643	2.08509
2016-02-19	WW samples	random in-hive	Late	132.724	2.12295
2016-02-19	WW samples	random in-hive	Late	46.9302	1.67145
2016-02-19	WW samples	random in-hive	Late	160.142	2.2045
2016-02-19	WW samples	random in-hive	Late	71.2863	1.85301
2016-02-19	WW samples	random in-hive	Late	1957.66	3.29174
2016-02-19	WW samples	random in-hive	Late	27.7839	1.44379
2016-02-19	WW samples	random in-hive	Late	26.416	1.42187
2016-02-19	WW samples	random in-hive	Late	32.2161	1.50807
2016-02-19	WW samples	random in-hive	Late	4.50709	0.653896
2016-02-19	WW samples	random in-hive	Late	8.48341	0.928571
2016-02-19	WW samples	random in-hive	Late	158.392	2.19973
2016-02-19	WW samples	random in-hive	Late	57.2124	1.75749
2016-02-19	WW samples	random in-hive	Late	12.8875	1.11017
2016-02-19	WW samples	random in-hive	Late	55.3459	1.74309
2016-02-19	WW samples	random in-hive	Late	83.6559	1.9225
2016-02-19	WW samples	random in-hive	Late	60.7571	1.7836

## Sheet: Abaecin
Anderson and Maes 2021, Gut and Colony Microbiota of Honey Bees Overwinter: Longevity Phenotypes, Social Immunity and Opportunistic Disease.
Table S4. Abaecin expression in the hypopharyngeal gland overwinter
Day month year	Sample set	Marked or random	Early/Mid/Late Winter	Normalized Abe Expression	log(Norm Abae Exp)				KA samples											CW samples									WW samples
2015-12-22	KA samples	19 Days old	Early	1.50866	0.178592
2015-12-22	KA samples	19 Days old	Early	0.0140584	-1.85207				Fit Group											Oneway Analysis of log(Norm Abae Exp) By Early/Late									Oneway Analysis of log(Norm Abae Exp) By Early/Late
2015-12-22	KA samples	19 Days old	Early	0.344708	-0.462549
2015-12-22	KA samples	19 Days old	Early	0.103693	-0.984249
2015-12-22	KA samples	19 Days old	Early	0.0274097	-1.5621				Oneway Analysis of log(Norm Abae Exp) By Early/Late											Quantiles									Quantiles
2015-12-22	KA samples	19 Days old	Early	0.0788215	-1.10336
2015-12-22	KA samples	19 Days old	Early	0.00381783	-2.41818															Level	Minimum	0.1	0.25	Median	0.75	0.9	Maximum		Level	Minimum	0.1	0.25	Median	0.75	0.9	Maximum
2015-12-22	KA samples	19 Days old	Early	0.000208833	-3.6802															Late	-1.59639	-1.56229	-1.19104	-0.79096	-0.33557	0.368419	1.1745		Late	-2.64477	-2.14162	-1.69937	-1.12348	-0.39011	0.368291	1.32419
2015-12-22	KA samples	19 Days old	Early	0.000377812	-3.42272				Quantiles											Early	-1.28182	-1.21636	-0.82032	-0.45229	0.04405	0.821956	1.05287		Early	-4.43164	-3.65191	-2.2894	-1.67909	-1.2092	-0.72756	-0.24703
2015-12-22	KA samples	19 Days old	Early	0.0489681	-1.31009
2015-12-22	KA samples	19 Days old	Early	0.0880604	-1.05522				Level	Minimum	0.1	0.25	Median	0.75	0.9	Maximum
2015-12-22	KA samples	19 Days old	Early	0.0135395	-1.8684				Late	-3.09277	-1.93029	-1.48487	-0.5958	0.490456	1.70922	2.20095
2016-01-05	KA samples	33 Days old	Mid	0.000507287	-3.29475				Early	-3.6802	-3.35874	-1.9775	-1.35899	-0.98705	-0.14198	0.731548
2016-01-05	KA samples	33 Days old	Mid	0.061252	-1.21288															Wilcoxon / Kruskal-Wallis Tests (Rank Sums)									Wilcoxon / Kruskal-Wallis Tests (Rank Sums)
2016-01-05	KA samples	33 Days old	Mid	0.157495	-0.802733
2016-01-05	KA samples	33 Days old	Mid	0.0641094	-1.19308															Level	Count	Score Sum	Expected Score	Score Mean	(Mean-Mean0)/Std0				Level	Count	Score Sum	Expected Score	Score Mean	(Mean-Mean0)/Std0
2016-01-05	KA samples	33 Days old	Mid	0.0390944	-1.40789															Late	18	252	288	14	-1.421				Late	16	323	264	20.1875	2.205
2016-01-05	KA samples	33 Days old	Mid	5.3895	0.731548				Wilcoxon / Kruskal-Wallis Tests (Rank Sums)											Early	13	244	208	18.7692	1.421				Early	16	205	264	12.8125	-2.205
2016-01-05	KA samples	33 Days old	Mid	0.0143937	-1.84183
2016-01-05	KA samples	33 Days old	Mid	0.00950479	-2.02206				Level	Count	Score Sum	Expected Score	Score Mean	(Mean-Mean0)/Std0
2016-01-05	KA samples	33 Days old	Mid	0.00968586	-2.01386				Late	22	648	517	29.4545	2.87
2016-01-05	KA samples	33 Days old	Mid	0.116571	-0.93341				Early	24	433	564	18.0417	-2.87
2016-01-05	KA samples	33 Days old	Mid	0.101053	-0.995453															2-Sample Test, Normal Approximation									2-Sample Test, Normal Approximation
2016-01-05	KA samples	33 Days old	Mid	0.0232983	-1.63268
2016-01-22	KA samples	50 Days old	Mid	0.0897862	-1.04679															S	Z	Prob>|Z|							S	Z	Prob>|Z|
2016-01-22	KA samples	50 Days old	Mid	0.011456	-1.94097															244	1.42114	0.1553							205	-2.2048	0.0275
2016-01-22	KA samples	50 Days old	Mid	0.000807654	-3.09277				2-Sample Test, Normal Approximation
2016-01-22	KA samples	50 Days old	Mid	0.195715	-0.708377
2016-01-22	KA samples	50 Days old	Mid	0.27953	-0.553571				S	Z	Prob>|Z|
2016-01-22	KA samples	50 Days old	Mid	0.608765	-0.21555				648	2.86969	0.0041
2016-01-22	KA samples	50 Days old	Mid	0.271017	-0.567003															1-Way Test, ChiSquare Approximation									1-Way Test, ChiSquare Approximation
2016-01-22	KA samples	50 Days old	Mid	9.96405	0.998436
2016-01-22	KA samples	50 Days old	Mid	158.837	2.20095															ChiSquare	DF	Prob>ChiSq							ChiSquare	DF	Prob>ChiSq
2016-01-22	KA samples	50 Days old	Mid	1.87137	0.272159															2.0769	1	0.1495							4.9446	1	0.0262
2016-01-22	KA samples	50 Days old	Mid	2.2072	0.343842				1-Way Test, ChiSquare Approximation
2016-01-22	KA samples	50 Days old	Mid	8.51716	0.930295
2016-02-11	KA samples	70 Days old	Late	20.0592	1.30231				ChiSquare	DF	Prob>ChiSq									Missing Rows	1
2016-02-11	KA samples	70 Days old	Late	0.12926	-0.888537				8.2984	1	0.004
2016-02-11	KA samples	70 Days old	Late	0.0164633	-1.78348
2016-02-11	KA samples	70 Days old	Late	0.219959	-0.657658
2016-02-11	KA samples	70 Days old	Late	76.4896	1.8836				Excluded Rows	64
2016-02-11	KA samples	70 Days old	Late	0.0124339	-1.90539
2016-02-11	KA samples	70 Days old	Late	0.474199	-0.32404				Oneway Analysis of log(Norm Abae Exp) By Age (Days)
2016-02-11	KA samples	70 Days old	Late	0.013717	-1.86274
2016-02-11	KA samples	70 Days old	Late	0.237362	-0.624589
2016-02-11	KA samples	70 Days old	Late	0.0411778	-1.38534
2015-10-19	CW samples	random in-hive	Early	0.373064	-0.428216				Quantiles
2015-10-19	CW samples	random in-hive	Early	2.12322	0.326996
2015-10-19	CW samples	random in-hive	Early	11.2946	1.05287				Level	Minimum	0.1	0.25	Median	0.75	0.9	Maximum
2015-10-19	CW samples	random in-hive	Early	0.39486	-0.403556				19	-3.6802	-3.60296	-2.28074	-1.43609	-1.00199	-0.01375	0.178592
2015-10-19	CW samples	random in-hive	Early	0.0761771	-1.11818				33	-3.29475	-2.91294	-1.97085	-1.31038	-0.94892	0.271264	0.731548
2015-10-19	CW samples	random in-hive	Early	0.127258	-0.895316				50	-3.09277	-2.74723	-0.96219	-0.38456	0.783682	1.8402	2.20095
2015-10-19	CW samples	random in-hive	Early	0.352945	-0.452293				70	-1.90539	-1.90113	-1.8033	-0.7731	0.082549	1.82547	1.8836
2015-10-19	CW samples	random in-hive	Early
2015-10-19	CW samples	random in-hive	Early	0.17975	-0.745332
2015-10-19	CW samples	random in-hive	Early	2.98939	0.475582
2015-10-19	CW samples	random in-hive	Early	0.313676	-0.503518
2015-10-19	CW samples	random in-hive	Early	0.0522617	-1.28182				Nonparametric Comparisons For All Pairs Using Steel-Dwass Method
2015-10-19	CW samples	random in-hive	Early	0.576904	-0.238896
2016-02-10	CW samples	random in-hive	Late	0.296835	-0.527485				q*	Alpha
2016-02-10	CW samples	random in-hive	Late	1.90044	0.278854				2.56903	0.05
2016-02-10	CW samples	random in-hive	Late	0.112422	-0.949148
2016-02-10	CW samples	random in-hive	Late	0.071915	-1.14318
2016-02-10	CW samples	random in-hive	Late	0.0276375	-1.5585
2016-02-10	CW samples	random in-hive	Late	0.459366	-0.337841				Level	- Level	Score Mean Difference	Std Err Dif	Z	p-Value	Hodges-Lehmann	Lower CL	Upper CL
2016-02-10	CW samples	random in-hive	Late	0.081129	-1.09082				50	19	7.08333	2.88675	2.45374	0.0674	1.32774	-0.0889	2.86683	+++++
2016-02-10	CW samples	random in-hive	Late	0.0391367	-1.40742				50	33	6.91667	2.88675	2.396	0.0778	1.19895	-0.24406	2.56297	+++++
2016-02-10	CW samples	random in-hive	Late	0.123353	-0.908849				70	19	4.125	2.78039	1.48361	0.4474	0.67953	-0.68013	2.86441	+++
2016-02-10	CW samples	random in-hive	Late	0.324617	-0.488629				70	33	4.125	2.78039	1.48361	0.4474	0.54532	-0.66966	2.63709	++
2016-02-10	CW samples	random in-hive	Late	0.469071	-0.328762				33	19	1.08333	2.88675	0.37528	0.982	0.11941	-0.95864	1.65814
2016-02-10	CW samples	random in-hive	Late	0.651977	-0.185767				70	50	-2.29167	2.78039	-0.82423	0.843	-0.63204	-2.1349	1.61144	--
2016-02-10	CW samples	random in-hive	Late	0.0253285	-1.59639
2016-02-10	CW samples	random in-hive	Late	0.19916	-0.700798
2016-02-10	CW samples	random in-hive	Late	0.328515	-0.483444				Excluded Rows	64
2016-02-10	CW samples	random in-hive	Late	0.131483	-0.88113
2016-02-10	CW samples	random in-hive	Late	0.0462795	-1.33461				KA samples
2016-02-10	CW samples	random in-hive	Late	14.9451	1.1745
2015-11-13	CW samples	random in-hive	Late	0.318095	-0.497443				Oneway Analysis of log(Norm Abae Exp) By Early/Late
2015-11-13	WW samples	random in-hive	Early	0.000481122	-3.31774
2015-11-13	WW samples	random in-hive	Early	0.00440827	-2.35573
2015-11-13	WW samples	random in-hive	Early	0.0011972	-2.92183
2015-11-13	WW samples	random in-hive	Early	0.0211076	-1.67556				Quantiles
2015-11-13	WW samples	random in-hive	Early	0.0686884	-1.16312
2015-11-13	WW samples	random in-hive	Early	0.00812091	-2.0904				Level	Minimum	0.1	0.25	Median	0.75	0.9	Maximum
2015-11-13	WW samples	random in-hive	Early	0.116546	-0.933501				Late	-3.09277	-1.93029	-1.48487	-0.5958	0.490456	1.70922	2.20095
2015-11-13	WW samples	random in-hive	Early	0.566199	-0.247031				Early	-3.6802	-3.35874	-1.9775	-1.35899	-0.98705	-0.14198	0.731548
2015-11-13	WW samples	random in-hive	Early	0.0496796	-1.30382
2015-11-13	WW samples	random in-hive	Early	0.0635119	-1.19714
2015-11-13	WW samples	random in-hive	Early	3.70134e-05	-4.43164
2015-11-13	WW samples	random in-hive	Early	0.0207674	-1.68262
2015-11-13	WW samples	random in-hive	Early	0.010934	-1.96122				Wilcoxon / Kruskal-Wallis Tests (Rank Sums)
2015-11-13	WW samples	random in-hive	Early	0.0279935	-1.55294
2015-11-13	WW samples	random in-hive	Early	0.0177212	-1.75151				Level	Count	Score Sum	Expected Score	Score Mean	(Mean-Mean0)/Std0
2015-11-13	WW samples	random in-hive	Early	0.056836	-1.24538				Late	22	648	517	29.4545	2.87
2016-02-19	WW samples	random in-hive	Late	0.0865837	-1.06256				Early	24	433	564	18.0417	-2.87
2016-02-19	WW samples	random in-hive	Late	0.0191915	-1.71689
2016-02-19	WW samples	random in-hive	Late	0.0654026	-1.18441
2016-02-19	WW samples	random in-hive	Late	0.0118581	-1.92599
2016-02-19	WW samples	random in-hive	Late	21.0953	1.32419
2016-02-19	WW samples	random in-hive	Late	0.469083	-0.32875				2-Sample Test, Normal Approximation
2016-02-19	WW samples	random in-hive	Late	0.266573	-0.574184
2016-02-19	WW samples	random in-hive	Late	0.225159	-0.647512				S	Z	Prob>|Z|
2016-02-19	WW samples	random in-hive	Late	0.531558	-0.274449				648	2.86969	0.0041
2016-02-19	WW samples	random in-hive	Late	0.00226586	-2.64477
2016-02-19	WW samples	random in-hive	Late	0.909121	-0.0413785
2016-02-19	WW samples	random in-hive	Late	0.0273042	-1.56377
2016-02-19	WW samples	random in-hive	Late	0.142111	-0.847372
2016-02-19	WW samples	random in-hive	Late	0.0130806	-1.88337				1-Way Test, ChiSquare Approximation
2016-02-19	WW samples	random in-hive	Late	0.0225535	-1.64679
2016-02-19	WW samples	random in-hive	Late	0.0641846	-1.19257				ChiSquare	DF	Prob>ChiSq
									8.2984	1	0.004

## Sheet: Glucose Oxidase
Anderson and Maes 2021, Gut and Colony Microbiota of Honey Bees Overwinter: Longevity Phenotypes, Social Immunity and Opportunistic Disease.
Table S4. Glucose Oxidase expression in the hypopharyngeal gland overwinter
Day month year	Sample set	Marked or random	Early/Mid/Late Winter	Normalized GOX Expression	log(Norm GOx Exp)
2015-12-22	KA samples	19 Days old	Early	41.1447	1.61431			KA samples											CW samples									WW samples
2015-12-22	KA samples	19 Days old	Early	3.10228	0.491681			Glucose Oxidase expression											Glucose Oxidase expression									Glucose Oxidase expression
2015-12-22	KA samples	19 Days old	Early	9.01561	0.954995			Oneway Analysis of log(Norm GOx Exp) comparing early to late winter											Oneway Analysis of log(Norm GOx Exp) comparing early to late winter									Oneway Analysis of log(Norm GOx Exp) comparing early to late winter
2015-12-22	KA samples	19 Days old	Early	20.7457	1.31693
2015-12-22	KA samples	19 Days old	Early	7.50837	0.875546
2015-12-22	KA samples	19 Days old	Early	28.7866	1.45919
2015-12-22	KA samples	19 Days old	Early	6.61955	0.820828			Quantiles											Quantiles									Quantiles
2015-12-22	KA samples	19 Days old	Early	4.39621	0.643078
2015-12-22	KA samples	19 Days old	Early	8.92872	0.950789			Level	Minimum	0.1	0.25	Median	0.75	0.9	Maximum				Level	Minimum	0.1	0.25	Median	0.75	0.9	Maximum		Level	Minimum	0.1	0.25	Median	0.75	0.9	Maximum
2015-12-22	KA samples	19 Days old	Early	3.46555	0.539772			Late	-0.01574	0.653631	0.934471	1.4679	1.78238	2.19477	2.54609				Late	0.232652	0.573013	0.884099	1.14958	1.52538	1.58849	1.62387		Late	1.00098	1.01251	1.18843	1.39481	1.65344	2.45761	2.93283
2015-12-22	KA samples	19 Days old	Early	16.4971	1.21741			Early	0.17786	0.278352	0.499977	0.878892	1.29601	1.54522	1.73928				Early	0.716905	0.762682	1.25442	1.49974	1.81573	2.01733	2.02809		Early	0.712744	0.787194	1.22362	1.35398	1.64792	2.17148	2.4806
2015-12-22	KA samples	19 Days old	Early	1.80328	0.256063
2016-01-05	KA samples	33 Days old	Mid	3.34861	0.524865
2016-01-05	KA samples	33 Days old	Mid	3.08091	0.488679			Wilcoxon / Kruskal-Wallis Tests (Rank Sums)											Wilcoxon / Kruskal-Wallis Tests (Rank Sums)									Wilcoxon / Kruskal-Wallis Tests (Rank Sums)
2016-01-05	KA samples	33 Days old	Mid	29.9309	1.47612
2016-01-05	KA samples	33 Days old	Mid	7.62498	0.882239			Level	Count	Score Sum	Expected Score	Score Mean	(Mean-Mean0)/Std0						Level	Count	Score Sum	Expected Score	Score Mean	(Mean-Mean0)/Std0				Level	Count	Score Sum	Expected Score	Score Mean	(Mean-Mean0)/Std0
2016-01-05	KA samples	33 Days old	Mid	1.50612	0.17786			Late	22	645	517	29.3182	2.804						Late	19	230	279	12.7778	-2.053				Late	15	241	240	16.0667	0.02
2016-01-05	KA samples	33 Days old	Mid	54.8626	1.73928			Early	24	436	564	18.1667	-2.804						Early	13	235	186	19.5833	2.053				Early	16	255	256	15.9375	-0.02
2016-01-05	KA samples	33 Days old	Mid	5.55336	0.744556
2016-01-05	KA samples	33 Days old	Mid	1.99821	0.300641
2016-01-05	KA samples	33 Days old	Mid	2.75361	0.439902			2-Sample Test, Normal Approximation											2-Sample Test, Normal Approximation									2-Sample Test, Normal Approximation
2016-01-05	KA samples	33 Days old	Mid	20.4117	1.30988
2016-01-05	KA samples	33 Days old	Mid	17.9632	1.25438			S	Z	Prob>|Z|									S	Z	Prob>|Z|							S	Z	Prob>|Z|
2016-01-05	KA samples	33 Days old	Mid	10.573	1.0242			645	2.80372	0.0051									235	2.05317	0.0401							241	0.01976	0.9842
2016-01-22	KA samples	50 Days old	Mid	8.68298	0.938669
2016-01-22	KA samples	50 Days old	Mid	8.35369	0.921878
2016-01-22	KA samples	50 Days old	Mid	32.0164	1.50537			1-Way Test, ChiSquare Approximation											1-Way Test, ChiSquare Approximation									1-Way Test, ChiSquare Approximation
2016-01-22	KA samples	50 Days old	Mid	4.232	0.626545
2016-01-22	KA samples	50 Days old	Mid	5.2099	0.716829			ChiSquare	DF	Prob>ChiSq									ChiSquare	DF	Prob>ChiSq							ChiSquare	DF	Prob>ChiSq
2016-01-22	KA samples	50 Days old	Mid	26.9418	1.43043			7.9226	1	0.0049									4.3029	1	0.038							0.0016	1	0.9685
2016-01-22	KA samples	50 Days old	Mid	8.69624	0.939332
2016-01-22	KA samples	50 Days old	Mid	351.631	2.54609
2016-01-22	KA samples	50 Days old	Mid	160.327	2.20501			Excluded Rows	64										Missing Rows	2								Missing Rows	1
2016-01-22	KA samples	50 Days old	Mid	148.209	2.17088
2016-01-22	KA samples	50 Days old	Mid	14.3314	1.15629			Oneway Analysis of log(Norm GOx Exp) By Age (Days)
2016-01-22	KA samples	50 Days old	Mid	60.2616	1.78004
2016-02-11	KA samples	70 Days old	Late	39.1976	1.59326
2016-02-11	KA samples	70 Days old	Late	41.9617	1.62285
2016-02-11	KA samples	70 Days old	Late	32.4384	1.51106			Quantiles
2016-02-11	KA samples	70 Days old	Late	9.72547	0.98791
2016-02-11	KA samples	70 Days old	Late	111.105	2.04573			Level	Minimum	0.1	0.25	Median	0.75	0.9	Maximum
2016-02-11	KA samples	70 Days old	Late	7.17396	0.855759			19	0.256063	0.326748	0.565599	0.913167	1.29205	1.56778	1.61431
2016-02-11	KA samples	70 Days old	Late	61.5728	1.78939			33	0.17786	0.214694	0.452096	0.813397	1.29601	1.66033	1.73928
2016-02-11	KA samples	70 Days old	Late	16.9033	1.22797			50	0.626545	0.653631	0.926076	1.29336	2.07317	2.44376	2.54609
2016-02-11	KA samples	70 Days old	Late	55.7095	1.74593			70	-0.01574	0.071413	0.954873	1.55216	1.75679	2.0201	2.04573
2016-02-11	KA samples	70 Days old	Late	0.964415	-0.0157361
2015-10-19	CW samples	random in-hive	Early	17.3897	1.24029
2015-10-19	CW samples	random in-hive	Early	58.0776	1.76401			Nonparametric Comparisons For All Pairs Using Steel-Dwass Method
2015-10-19	CW samples	random in-hive	Early	32.5451	1.51249
2015-10-19	CW samples	random in-hive	Early	56.7289	1.7538			q*	Alpha
2015-10-19	CW samples	random in-hive	Early	5.2108	0.716905			2.56903	0.05
2015-10-19	CW samples	random in-hive	Early	19.8074	1.29683
2015-10-19	CW samples	random in-hive	Early	106.681	2.02809
2015-10-19	CW samples	random in-hive	Early	14.3363	1.15644
2015-10-19	CW samples	random in-hive	Early	98.2229	1.99221			Level	- Level	Score Mean Difference	Std Err Dif	Z	p-Value	Hodges-Lehmann	Lower CL	Upper CL
2015-10-19	CW samples	random in-hive	Early	68.0724	1.83297			50	33	5.91667	2.88675	2.04959	0.17	0.481575	-0.233904	1.29136	++++
2015-10-19	CW samples	random in-hive	Early	7.4045	0.869496			70	19	5.775	2.78039	2.07705	0.1606	0.484345	-0.271799	1.09494	++++
2015-10-19	CW samples	random in-hive	Early	30.6895	1.48699			70	33	5.40833	2.78039	1.94517	0.2092	0.541507	-0.266473	1.25725	+++++
2015-10-19	CW samples	random in-hive	Early	26.9231	1.43012			50	19	4.91667	2.88675	1.70318	0.3219	0.438592	-0.23396	1.24027	++++
2016-02-10	CW samples	random in-hive	Late	33.1476	1.52045			70	50	0.45833	2.78039	0.16485	0.9984	0.04891	-0.942905	0.807261
2016-02-10	CW samples	random in-hive	Late	18.2816	1.26201			33	19	-1.25	2.88675	-0.43301	0.9728	-0.074514	-0.654354	0.521868	-
2016-02-10	CW samples	random in-hive	Late	7.53198	0.876909
2016-02-10	CW samples	random in-hive	Late	38.4204	1.58456
2016-02-10	CW samples	random in-hive	Late	42.0598	1.62387			Excluded Rows	64
2016-02-10	CW samples	random in-hive	Late	12.0072	1.07944
2016-02-10	CW samples	random in-hive	Late	5.75182	0.759805			KA samples
2016-02-10	CW samples	random in-hive	Late	1.70864	0.232652
2016-02-10	CW samples	random in-hive	Late	12.3723	1.09245			Oneway Analysis of log(Norm GOx Exp) By young (19-33) / old (50-70)
2016-02-10	CW samples	random in-hive	Late	34.6854	1.54015
2016-02-10	CW samples	random in-hive	Late	17.649	1.24672			Quantiles
2016-02-10	CW samples	random in-hive	Late	38.1136	1.58108
2016-02-10	CW samples	random in-hive	Late	15.6493	1.19449			Level	Minimum	0.1	0.25	Median	0.75	0.9	Maximum
2016-02-10	CW samples	random in-hive	Late	19.5298	1.2907			old	-0.01574	0.653631	0.934471	1.4679	1.78238	2.19477	2.54609
2016-02-10	CW samples	random in-hive	Late	7.70008	0.886495			young	0.17786	0.278352	0.499977	0.878892	1.29601	1.54522	1.73928
2016-02-10	CW samples	random in-hive	Late	4.08161	0.610831
2016-02-10	CW samples	random in-hive	Late	12.7254	1.10467
2016-02-10	CW samples	random in-hive	Late	8.84897	0.946893			Wilcoxon / Kruskal-Wallis Tests (Rank Sums)
2016-02-10	CW samples	random in-hive	Late
2016-11-13	WW samples	random in-hive	Early	17.3711	1.23983			Level	Count	Score Sum	Expected Score	Score Mean	(Mean-Mean0)/Std0
2016-11-13	WW samples	random in-hive	Early	5.16112	0.712744			old	22	645	517	29.3182	2.804
2016-11-13	WW samples	random in-hive	Early	34.9574	1.54354			young	24	436	564	18.1667	-2.804
2016-11-13	WW samples	random in-hive	Early	109.395	2.039
2016-11-13	WW samples	random in-hive	Early	21.9539	1.34151
2016-11-13	WW samples	random in-hive	Early	25.1378	1.40033
2016-11-13	WW samples	random in-hive	Early	6.59328	0.819102
2016-11-13	WW samples	random in-hive	Early	38.7939	1.58876			2-Sample Test, Normal Approximation
2016-11-13	WW samples	random in-hive	Early	18.1044	1.25778
2016-11-13	WW samples	random in-hive	Early	16.528	1.21822			S	Z	Prob>|Z|
2016-11-13	WW samples	random in-hive	Early	19.3083	1.28574			645	2.80372	0.0051
2016-11-13	WW samples	random in-hive	Early	23.2509	1.36644
2016-11-13	WW samples	random in-hive	Early	302.415	2.4806
2016-11-13	WW samples	random in-hive	Early	86.3711	1.93637
2016-11-13	WW samples	random in-hive	Early	46.5202	1.66764
2016-11-13	WW samples	random in-hive	Early	15.6846	1.19547			1-Way Test, ChiSquare Approximation
2016-02-19	WW samples	random in-hive	Late	17.0236	1.23105
2016-02-19	WW samples	random in-hive	Late	35.5443	1.55077			ChiSquare	DF	Prob>ChiSq
2016-02-19	WW samples	random in-hive	Late	45.0236	1.65344			7.9226	1	0.0049
2016-02-19	WW samples	random in-hive	Late	24.8204	1.39481
2016-02-19	WW samples	random in-hive	Late	856.709	2.93283
2016-02-19	WW samples	random in-hive	Late	17.0482	1.23168
2016-02-19	WW samples	random in-hive	Late	27.3491	1.43694
2016-02-19	WW samples	random in-hive	Late	29.1206	1.4642
2016-02-19	WW samples	random in-hive	Late	48.985	1.69006
2016-02-19	WW samples	random in-hive	Late	10.4761	1.0202
2016-02-19	WW samples	random in-hive	Late	138.292	2.1408
2016-02-19	WW samples	random in-hive	Late	13.1031	1.11737
2016-02-19	WW samples	random in-hive	Late	10.0227	1.00098
2016-02-19	WW samples	random in-hive	Late	15.4324	1.18843
2016-02-19	WW samples	random in-hive	Late	24.0744	1.38155

## Sheet: CuZnSod
Anderson and Maes 2021, Gut and Colony Microbiota of Honey Bees Overwinter: Longevity Phenotypes, Social Immunity and Opportunistic Disease.
Table S4. Copper Zinc Superoxide dismutase expression in the hypopharyngeal gland overwinter
Day month year	Sample set	Marked or random	Early/Mid/Late Winter	Normalized Zn/Cu Expression	log(Norm CuZn SOD Exp)
2015-12-22	KA samples	19 Days old	Early	0.0474915	-1.32338				KA samples											CW samples									WW samples
2015-12-22	KA samples	19 Days old	Early	0.0109154	-1.96196
2015-12-22	KA samples	19 Days old	Early	0.0489233	-1.31048				Oneway Analysis of log(Norm CuZn SOD Exp) By Early/Late											Oneway Analysis of log(Norm CuZn SOD Exp) By early / late winter									Oneway Analysis of log(Norm CuZn SOD Exp) By Early/Late WW samples
2015-12-22	KA samples	19 Days old	Early	0.0316471	-1.49967
2015-12-22	KA samples	19 Days old	Early	0.0054214	-2.26589
2015-12-22	KA samples	19 Days old	Early	0.0435197	-1.36131
2015-12-22	KA samples	19 Days old	Early	0.0135315	-1.86865				Quantiles											Quantiles									Quantiles
2015-12-22	KA samples	19 Days old	Early	0.0382214	-1.41769
2015-12-22	KA samples	19 Days old	Early	0.0538152	-1.2691				Level	Minimum	0.1	0.25	Median	0.75	0.9	Maximum				Level	Minimum	0.1	0.25	Median	0.75	0.9	Maximum		Level	Minimum	0.1	0.25	Median	0.75	0.9	Maximum
2015-12-22	KA samples	19 Days old	Early	0.0458359	-1.33879				Late	-1.32009	-1.3043	-0.99713	-0.69645	-0.45367	-0.22368	0.317951				Early	-1.3558	-1.34096	-1.05945	-0.9334	-0.69067	-0.2084	-0.08548		Early	-1.20106	-0.98156	-0.66442	-0.52944	-0.1697	0.071376	0.190862
2015-12-22	KA samples	19 Days old	Early	0.0501821	-1.29945				Early	-2.48663	-2.24797	-1.8289	-1.48081	-1.30422	-0.95952	-0.87058				Late	-1.5818	-1.55445	-1.0277	-0.93498	-0.73875	-0.44615	-0.28679		Late	-1.23849	-1.22211	-0.71586	-0.45154	-0.28814	-0.05821	-0.03815
2015-12-22	KA samples	20 Days old	Early	0.0168647	-1.77302
2016-01-05	KA samples	33 Days old	Mid	0.00588766	-2.23006
2016-01-05	KA samples	33 Days old	Mid	0.00326112	-2.48663
2016-01-05	KA samples	33 Days old	Mid	0.120157	-0.920252
2016-01-05	KA samples	33 Days old	Mid	0.0239709	-1.62032				Wilcoxon / Kruskal-Wallis Tests (Rank Sums)											Wilcoxon / Kruskal-Wallis Tests (Rank Sums)									Wilcoxon / Kruskal-Wallis Tests (Rank Sums)
2016-01-05	KA samples	33 Days old	Mid	0.0177618	-1.75051
2016-01-05	KA samples	33 Days old	Mid	0.134717	-0.870578				Level	Count	Score Sum	Expected Score	Score Mean	(Mean-Mean0)/Std0						Level	Count	Score Sum	Expected Score	Score Mean	(Mean-Mean0)/Std0				Level	Count	Score Sum	Expected Score	Score Mean	(Mean-Mean0)/Std0
2016-01-05	KA samples	33 Days old	Mid	0.0345174	-1.46196				Late	22	751	517	34.1364	5.135						Late	18	293	288	16.2778	0.18				Late	16	280	264	17.5	0.584
2016-01-05	KA samples	33 Days old	Mid	0.0142063	-1.84752				Early	24	330	564	13.75	-5.135						Early	13	203	208	15.6154	-0.18				Early	16	248	264	15.5	-0.584
2016-01-05	KA samples	33 Days old	Mid	0.0178402	-1.7486
2016-01-05	KA samples	33 Days old	Mid	0.0239877	-1.62001
2016-01-05	KA samples	33 Days old	Mid	0.100281	-0.99878
2016-01-05	KA samples	33 Days old	Mid	0.0498726	-1.30214
2016-01-22	KA samples	50 Days old	Mid	0.0478531	-1.32009				2-Sample Test, Normal Approximation											2-Sample Test, Normal Approximation									2-Sample Test, Normal Approximation
2016-01-22	KA samples	50 Days old	Mid	0.102033	-0.99126
2016-01-22	KA samples	50 Days old	Mid	0.103754	-0.983995				S	Z	Prob>|Z|									S	Z	Prob>|Z|							S	Z	Prob>|Z|
2016-01-22	KA samples	50 Days old	Mid	0.206054	-0.686018				751	5.13466	<.0001									203	-0.18014	0.857							248	-0.58418	0.5591
2016-01-22	KA samples	50 Days old	Mid	0.139383	-0.855789
2016-01-22	KA samples	50 Days old	Mid	0.102541	-0.989104
2016-01-22	KA samples	50 Days old	Mid	0.0966594	-1.01476
2016-01-22	KA samples	50 Days old	Mid	2.07946	0.317951
2016-01-22	KA samples	50 Days old	Mid	0.640218	-0.193672				1-Way Test, ChiSquare Approximation											1-Way Test, ChiSquare Approximation									1-Way Test, ChiSquare Approximation
2016-01-22	KA samples	50 Days old	Mid	0.196387	-0.706886
2016-01-22	KA samples	50 Days old	Mid	0.137952	-0.860271				ChiSquare	DF	Prob>ChiSq									ChiSquare	DF	Prob>ChiSq							ChiSquare	DF	Prob>ChiSq
2016-01-22	KA samples	50 Days old	Mid	0.480039	-0.318724				26.4778	1	<.0001									0.0401	1	0.8414							0.3636	1	0.5465
2016-02-11	KA samples	70 Days old	Late	0.508526	-0.293687
2016-02-11	KA samples	70 Days old	Late	0.337929	-0.471174
2016-02-11	KA samples	70 Days old	Late	0.239979	-0.619827				Excluded Rows	64										Missing Rows	1
2016-02-11	KA samples	70 Days old	Late	0.081082	-1.09108
2016-02-11	KA samples	70 Days old	Late	0.322579	-0.491364				Oneway Analysis of log(Norm Zn/Cu Exp) By Age (Days)
2016-02-11	KA samples	70 Days old	Late	0.048447	-1.31473
2016-02-11	KA samples	70 Days old	Late	0.206122	-0.685876
2016-02-11	KA samples	70 Days old	Late	0.0524847	-1.27997
2016-02-11	KA samples	70 Days old	Late	0.397049	-0.401156				Quantiles
2016-02-11	KA samples	70 Days old	Late	0.219231	-0.659099
2015-10-19	CW samples	random in-hive	Early	0.089034	-1.05044				Level	Minimum	0.1	0.25	Median	0.75	0.9	Maximum
2015-10-19	CW samples	random in-hive	Early	0.172099	-0.764222				19	-2.26589	-2.17471	-1.84475	-1.3895	-1.31371	-1.2782	-1.2691
2015-10-19	CW samples	random in-hive	Early	0.129567	-0.887507				33	-2.48663	-2.40966	-1.82327	-1.62016	-1.07462	-0.88548	-0.87058
2015-10-19	CW samples	random in-hive	Early	0.0988668	-1.00495				50	-1.32009	-1.22849	-0.99072	-0.85803	-0.41055	0.164464	0.317951
2015-10-19	CW samples	random in-hive	Early	0.167008	-0.777263				70	-1.31473	-1.31126	-1.1383	-0.63946	-0.45367	-0.30443	-0.29369
2015-10-19	CW samples	random in-hive	Early	0.101672	-0.992797
2015-10-19	CW samples	random in-hive	Early	0.516667	-0.286789
2015-10-19	CW samples	random in-hive	Early	0.0306595	-1.51343
2015-10-19	CW samples	random in-hive	Early	0.206443	-0.6852
2015-10-19	CW samples	random in-hive	Early	0.108214	-0.965717				Nonparametric Comparisons For All Pairs Using Steel-Dwass Method
2015-10-19	CW samples	random in-hive	Early	0.0261939	-1.5818
2015-10-19	CW samples	random in-hive	Early	0.19352	-0.713275				q*	Alpha
2015-10-19	CW samples	random in-hive	Early	0.116151	-0.934978				2.56903	0.05
2016-02-10	CW samples	random in-hive	Late	0.111022	-0.954589
2016-02-10	CW samples	random in-hive	Late	0.096778	-1.01422
2016-02-10	CW samples	random in-hive	Late	0.0440762	-1.3558
2016-02-10	CW samples	random in-hive	Late	0.821328	-0.0854833				Level	- Level	Score Mean Difference	Std Err Dif	Z	p-Value	Hodges-Lehmann	Lower CL	Upper CL
2016-02-10	CW samples	random in-hive	Late	0.369859	-0.431964				50	19	11.4167	2.88675	3.95485	0.0004	0.721242	0.347535	1.27678	+++++++
2016-02-10	CW samples	random in-hive	Late	0.122401	-0.912217				70	19	10.175	2.78039	3.65956	0.0014	0.835665	0.232308	1.30185	++++++++
2016-02-10	CW samples	random in-hive	Late	0.0845449	-1.07291				50	33	9.75	2.88675	3.3775	0.0041	0.764566	0.234234	1.47188	+++++++
2016-02-10	CW samples	random in-hive	Late	0.0881114	-1.05497				70	33	9.075	2.78039	3.26393	0.006	0.908153	0.300425	1.37634	+++++++++
2016-02-10	CW samples	random in-hive	Late	0.0647212	-1.18895				70	50	1.1917	2.78039	0.4286	0.9736	0.056989	-0.573081	0.520085	+
2016-02-10	CW samples	random in-hive	Late	0.599706	-0.222061				33	19	-0.0833	2.88675	-0.02887	1	-0.017864	-0.479506	0.490736
2016-02-10	CW samples	random in-hive	Late	0.144017	-0.841587
2016-02-10	CW samples	random in-hive	Late	0.127811	-0.89343
2016-02-10	CW samples	random in-hive	Late	0.0457817	-1.33931				Excluded Rows	64
2016-02-10	CW samples	random in-hive	Late	0.0997944	-1.00089
2016-02-10	CW samples	random in-hive	Late	0.110154	-0.958				KA samples
2016-02-10	CW samples	random in-hive	Late	0.186456	-0.729423				Oneway Analysis of log(Norm Zn/Cu Exp) By young (19-33) / old (50-70)
2016-02-10	CW samples	random in-hive	Late	0.202193	-0.694234
2016-02-10	CW samples	random in-hive	Late	0.208948	-0.679961
2016-02-10	CW samples	random in-hive	Late
2015-11-13	WW samples	random in-hive	Early	0.0577445	-1.23849				Quantiles
2015-11-13	WW samples	random in-hive	Early	0.0609416	-1.21509
2015-11-13	WW samples	random in-hive	Early	0.365351	-0.43729				Level	Minimum	0.1	0.25	Median	0.75	0.9	Maximum
2015-11-13	WW samples	random in-hive	Early	0.915907	-0.0381485				Late	-1.32009	-1.3043	-0.99713	-0.69645	-0.45367	-0.22368	0.317951
2015-11-13	WW samples	random in-hive	Early	0.195965	-0.707822				Early	-2.48663	-2.24797	-1.8289	-1.48081	-1.30422	-0.95952	-0.87058
2015-11-13	WW samples	random in-hive	Early	0.221958	-0.653729
2015-11-13	WW samples	random in-hive	Early	0.129176	-0.888818
2015-11-13	WW samples	random in-hive	Early	0.39399	-0.404515
2015-11-13	WW samples	random in-hive	Early	0.252239	-0.598187
2015-11-13	WW samples	random in-hive	Early	0.487582	-0.311952				Wilcoxon / Kruskal-Wallis Tests (Rank Sums)
2015-11-13	WW samples	random in-hive	Early	0.191189	-0.718537
2015-11-13	WW samples	random in-hive	Early	0.475996	-0.322396				Level	Count	Score Sum	Expected Score	Score Mean	(Mean-Mean0)/Std0
2015-11-13	WW samples	random in-hive	Early	0.857409	-0.066812				Late	22	751	517	34.1364	5.135
2015-11-13	WW samples	random in-hive	Early	0.721998	-0.141464				Early	24	330	564	13.75	-5.135
2015-11-13	WW samples	random in-hive	Early	0.524564	-0.280201
2015-11-13	WW samples	random in-hive	Early	0.342143	-0.465792
2016-02-19	WW samples	random in-hive	Late	0.257063	-0.58996
2016-02-19	WW samples	random in-hive	Late	0.254536	-0.594251
2016-02-19	WW samples	random in-hive	Late	0.929679	-0.0316669				2-Sample Test, Normal Approximation
2016-02-19	WW samples	random in-hive	Late	0.286673	-0.542613
2016-02-19	WW samples	random in-hive	Late	1.5519	0.190862				S	Z	Prob>|Z|
2016-02-19	WW samples	random in-hive	Late	0.15571	-0.807682				751	5.13466	<.0001
2016-02-19	WW samples	random in-hive	Late	0.686216	-0.163539
2016-02-19	WW samples	random in-hive	Late	0.483532	-0.315575
2016-02-19	WW samples	random in-hive	Late	0.648338	-0.188199
2016-02-19	WW samples	random in-hive	Late	0.243086	-0.61424
2016-02-19	WW samples	random in-hive	Late	1.04753	0.0201678				1-Way Test, ChiSquare Approximation
2016-02-19	WW samples	random in-hive	Late	0.489833	-0.309952
2016-02-19	WW samples	random in-hive	Late	0.129574	-0.887483				ChiSquare	DF	Prob>ChiSq
2016-02-19	WW samples	random in-hive	Late	0.304596	-0.516276				26.4778	1	<.0001
2016-02-19	WW samples	random in-hive	Late	0.208379	-0.681147
2016-02-19	WW samples	random in-hive	Late	0.0629416	-1.20106

## Sheet: MnSod
Anderson and Maes 2021, Gut and Colony Microbiota of Honey Bees Overwinter: Longevity Phenotypes, Social Immunity and Opportunistic Disease.
Table S4. Manganese Superoxide dismutase expression in the hypopharyngeal gland overwinter
Day month year	Sample set	Marked or random	Early/Mid/Late Winter	Normalized MnSOD Expression	log(Norm MnSOD Exp)
2015-12-22	KA samples	19 Days old	Early	0.00532134	-2.27398			KA samples											CW samples										WW samples
2015-12-22	KA samples	19 Days old	Early	0.00112668	-2.9482																								Oneway Analysis of log(Norm Mn Exp) By Early/Late Location=SRER, AZ
2015-12-22	KA samples	19 Days old	Early	0.00323623	-2.48996			Oneway Analysis of log(Norm Mn Exp) By Early/Late											Oneway Analysis of log(Norm Mn Exp) By Early/Late Location=CW samples
2015-12-22	KA samples	19 Days old	Early	0.00364581	-2.43821
2015-12-22	KA samples	19 Days old	Early	0.000612411	-3.21296
2015-12-22	KA samples	19 Days old	Early	0.00489186	-2.31053																								Quantiles
2015-12-22	KA samples	19 Days old	Early	0.00170273	-2.76886			Quantiles											Wilcoxon / Kruskal-Wallis Tests (Rank Sums)
2015-12-22	KA samples	19 Days old	Early	0.00381628	-2.41836																								Level	Minimum	0.1	0.25	Median	0.75	0.9	Maximum
2015-12-22	KA samples	19 Days old	Early	0.00432753	-2.36376			Level	Minimum	0.1	0.25	Median	0.75	0.9	Maximum				Level	Count	Score Sum	Expected Score	Score Mean	(Mean-Mean0)/Std0					Late	-1.88412	-1.84933	-1.78094	-1.61551	-1.35176	-0.96301	-0.657
2015-12-22	KA samples	19 Days old	Early	0.00650394	-2.18682			Late	-2.23684	-2.17845	-1.93442	-1.57986	-1.32066	-1.04691	-0.76611				Late	18	305	288	16.9444	0.661					Early	-2.35943	-2.19883	-2.00771	-1.68365	-1.3498	-1.10425	-0.94091
2015-12-22	KA samples	19 Days old	Early	0.00671901	-2.17269			Early	-3.30052	-3.14398	-2.76421	-2.43229	-2.25361	-2.11538	-2.05722				Early	13	191	208	14.6923	-0.661
2015-12-22	KA samples	19 Days old	Early	0.00110174	-2.95792
2016-01-05	KA samples	33 Days old	Mid	0.000841407	-3.07499
2016-01-05	KA samples	33 Days old	Mid	0.000500583	-3.30052
2016-01-05	KA samples	33 Days old	Mid	0.00609935	-2.21472																								Wilcoxon / Kruskal-Wallis Tests (Rank Sums)
2016-01-05	KA samples	33 Days old	Mid	0.00298576	-2.52494			Wilcoxon / Kruskal-Wallis Tests (Rank Sums)											2-Sample Test, Normal Approximation
2016-01-05	KA samples	33 Days old	Mid	0.00201107	-2.69657																								Level	Count	Score Sum	Expected Score	Score Mean	(Mean-Mean0)/Std0
2016-01-05	KA samples	33 Days old	Mid	0.00874871	-2.05806			Level	Count	Score Sum	Expected Score	Score Mean	(Mean-Mean0)/Std0						S	Z	Prob>|Z|								Late	14	244	217	17.4286	1.102
2016-01-05	KA samples	33 Days old	Mid	0.00506049	-2.29581			Late	22	771	517	35.0455	5.574						191	-0.66053	0.5089								Early	16	221	248	13.8125	-1.102
2016-01-05	KA samples	33 Days old	Mid	0.00226976	-2.64402			Early	24	310	564	12.9167	-5.574
2016-01-05	KA samples	33 Days old	Mid	0.00177719	-2.75027
2016-01-05	KA samples	33 Days old	Mid	0.00374657	-2.42637
2016-01-05	KA samples	33 Days old	Mid	0.00876552	-2.05722
2016-01-05	KA samples	33 Days old	Mid	0.00566473	-2.24682														1-Way Test, ChiSquare Approximation										2-Sample Test, Normal Approximation
2016-01-22	KA samples	50 Days old	Mid	0.0118794	-1.9252			2-Sample Test, Normal Approximation
2016-01-22	KA samples	50 Days old	Mid	0.00691897	-2.15996														ChiSquare	DF	Prob>ChiSq								S	Z	Prob>|Z|
2016-01-22	KA samples	50 Days old	Mid	0.0153462	-1.814			S	Z	Prob>|Z|									0.4631	1	0.4962								244	1.10162	0.2706
2016-01-22	KA samples	50 Days old	Mid	0.0236662	-1.62587			771	5.57446	<.0001
2016-01-22	KA samples	50 Days old	Mid	0.0206862	-1.68432
2016-01-22	KA samples	50 Days old	Mid	0.0143325	-1.84368														Missing Rows	1
2016-01-22	KA samples	50 Days old	Mid	0.0109125	-1.96208
2016-01-22	KA samples	50 Days old	Mid	0.171352	-0.76611																								1-Way Test, ChiSquare Approximation
2016-01-22	KA samples	50 Days old	Mid	0.0827739	-1.08211			1-Way Test, ChiSquare Approximation
2016-01-22	KA samples	50 Days old	Mid	0.020239	-1.69381																								ChiSquare	DF	Prob>ChiSq
2016-01-22	KA samples	50 Days old	Mid	0.0348395	-1.45793			ChiSquare	DF	Prob>ChiSq																			1.2598	1	0.2617
2016-01-22	KA samples	50 Days old	Mid	0.0754234	-1.12249			31.1973	1	<.0001
2016-02-11	KA samples	70 Days old	Late	0.0929326	-1.03183
2016-02-11	KA samples	70 Days old	Late	0.0322877	-1.49096																								Missing Rows	2
2016-02-11	KA samples	70 Days old	Late	0.0292523	-1.53384			Excluded Rows	64
2016-02-11	KA samples	70 Days old	Late	0.0108794	-1.96339
2016-02-11	KA samples	70 Days old	Late	0.0313735	-1.50344			Oneway Analysis of log(Norm Mn Exp) By Age (Days)
2016-02-11	KA samples	70 Days old	Late	0.00651063	-2.18638
2016-02-11	KA samples	70 Days old	Late	0.0323699	-1.48986
2016-02-11	KA samples	70 Days old	Late	0.00579637	-2.23684
2016-02-11	KA samples	70 Days old	Late	0.0510226	-1.29224			Quantiles
2016-02-11	KA samples	70 Days old	Late	0.0467588	-1.33014
2015-10-19	CW samples	random in-hive	Early	0.00854175	-2.06845			Level	Minimum	0.1	0.25	Median	0.75	0.9	Maximum
2015-10-19	CW samples	random in-hive	Early	0.0153822	-1.81298			19	-3.21296	-3.13645	-2.90336	-2.42828	-2.28312	-2.17693	-2.17269
2015-10-19	CW samples	random in-hive	Early	0.0110846	-1.95528			33	-3.30052	-3.23287	-2.73684	-2.47566	-2.22274	-2.05747	-2.05722
2015-10-19	CW samples	random in-hive	Early	0.0144251	-1.84088			50	-2.15996	-2.10059	-1.90482	-1.68906	-1.20635	-0.86091	-0.76611
2015-10-19	CW samples	random in-hive	Early	0.0301631	-1.52052			70	-2.23684	-2.2318	-2.01914	-1.4972	-1.32066	-1.05787	-1.03183
2015-10-19	CW samples	random in-hive	Early	0.0214436	-1.6687
2015-10-19	CW samples	random in-hive	Early	0.041678	-1.38009
2015-10-19	CW samples	random in-hive	Early	0.00491361	-2.3086
2015-10-19	CW samples	random in-hive	Early	0.0346979	-1.4597
2015-10-19	CW samples	random in-hive	Early	0.00830355	-2.08074			Nonparametric Comparisons For All Pairs Using Steel-Dwass Method
2015-10-19	CW samples	random in-hive	Early	0.00419006	-2.37778
2015-10-19	CW samples	random in-hive	Early	0.0396507	-1.40175			q*	Alpha
2015-10-19	CW samples	random in-hive	Early	0.0138433	-1.85876			2.56903	0.05
2016-02-10	CW samples	random in-hive	Late	0.0165192	-1.78201
2016-02-10	CW samples	random in-hive	Late	0.0103848	-1.9836
2016-02-10	CW samples	random in-hive	Late	0.011646	-1.93382
2016-02-10	CW samples	random in-hive	Late	0.027366	-1.56279			Level	- Level	Score Mean Difference	Std Err Dif	Z	p-Value	Hodges-Lehmann	Lower CL	Upper CL
2016-02-10	CW samples	random in-hive	Late	0.0307877	-1.51162			50	19	11.9167	2.88675	4.12805	0.0002	0.858344	0.476131	1.40658	++++++++
2016-02-10	CW samples	random in-hive	Late	0.0128109	-1.89242			50	33	11.5833	2.88675	4.01258	0.0003	0.867734	0.400718	1.44912	+++++++++
2016-02-10	CW samples	random in-hive	Late	0.0103953	-1.98316			70	19	10.3583	2.78039	3.7255	0.0011	0.931635	0.347131	1.45724	+++++++++
2016-02-10	CW samples	random in-hive	Late	0.0153493	-1.81391			70	33	9.99167	2.78039	3.59362	0.0019	0.922705	0.407177	1.42013	+++++++++
2016-02-10	CW samples	random in-hive	Late	0.00565897	-2.24726			33	19	0.58333	2.88675	0.202073	0.9971	0.0432107	-0.386507	0.46269
2016-02-10	CW samples	random in-hive	Late	0.0803027	-1.09527			70	50	0.275	2.78039	0.098907	0.9997	0.0913471	-0.543034	0.521762	+
2016-02-10	CW samples	random in-hive	Late	0.0245594	-1.60978
2016-02-10	CW samples	random in-hive	Late	0.0260592	-1.58404
2016-02-10	CW samples	random in-hive	Late	0.0130052	-1.88588			Excluded Rows	64
2016-02-10	CW samples	random in-hive	Late	0.0202088	-1.69446
2016-02-10	CW samples	random in-hive	Late	0.0214213	-1.66915			KA samples
2016-02-10	CW samples	random in-hive	Late	0.0495616	-1.30485			Oneway Analysis of log(Norm Mn Exp) By 19-33/50-70 KA samples
2016-02-10	CW samples	random in-hive	Late	0.00694169	-2.15853
2016-02-10	CW samples	random in-hive	Late	0.0489825	-1.30996
2015-11-13	WW samples	random in-hive	Early
2015-11-13	WW samples	random in-hive	Early	0.00799267	-2.09731			Quantiles
2015-11-13	WW samples	random in-hive	Early	0.00437089	-2.35943
2015-11-13	WW samples	random in-hive	Early	0.0554527	-1.25608			Level	Minimum	0.1	0.25	Median	0.75	0.9	Maximum
2015-11-13	WW samples	random in-hive	Early	0.0669503	-1.17425			Late	-2.23684	-2.17845	-1.93442	-1.57986	-1.32066	-1.04691	-0.76611
2015-11-13	WW samples	random in-hive	Early	0.0128727	-1.89033			Early	-3.30052	-3.14398	-2.76421	-2.43229	-2.25361	-2.11538	-2.05722
2015-11-13	WW samples	random in-hive	Early	0.00908031	-2.0419
2015-11-13	WW samples	random in-hive	Early	0.00741302	-2.13
2015-11-13	WW samples	random in-hive	Early	0.0193849	-1.71254
2015-11-13	WW samples	random in-hive	Early	0.0151942	-1.81832
2015-11-13	WW samples	random in-hive	Early	0.0484639	-1.31458			Wilcoxon / Kruskal-Wallis Tests (Rank Sums)
2015-11-13	WW samples	random in-hive	Early	0.0124405	-1.90516
2015-11-13	WW samples	random in-hive	Early	0.0350383	-1.45546			Level	Count	Score Sum	Expected Score	Score Mean	(Mean-Mean0)/Std0
2015-11-13	WW samples	random in-hive	Early	0.114574	-0.940913			Late	22	771	517	35.0455	5.574
2015-11-13	WW samples	random in-hive	Early	0.0326314	-1.48636			Early	24	310	564	12.9167	-5.574
2015-11-13	WW samples	random in-hive	Early	0.0241285	-1.61747
2015-11-13	WW samples	random in-hive	Early	0.022143	-1.65476
2016-02-19	WW samples	random in-hive	Late	0.0204801	-1.68867
2016-02-19	WW samples	random in-hive	Late	0.0538242	-1.26902
2016-02-19	WW samples	random in-hive	Late	0.0420728	-1.376			2-Sample Test, Normal Approximation
2016-02-19	WW samples	random in-hive	Late	0.013058	-1.88412
2016-02-19	WW samples	random in-hive	Late	0.220292	-0.657001			S	Z	Prob>|Z|
2016-02-19	WW samples	random in-hive	Late					771	5.57446	<.0001
2016-02-19	WW samples	random in-hive	Late	0.0153276	-1.81453
2016-02-19	WW samples	random in-hive	Late	0.0279457	-1.55369
2016-02-19	WW samples	random in-hive	Late	0.0354795	-1.45002
2016-02-19	WW samples	random in-hive	Late	0.0166004	-1.77988
2016-02-19	WW samples	random in-hive	Late	0.0525964	-1.27904			1-Way Test, ChiSquare Approximation
2016-02-19	WW samples	random in-hive	Late	0.0420621	-1.37611
2016-02-19	WW samples	random in-hive	Late	0.0210217	-1.67733			ChiSquare	DF	Prob>ChiSq
2016-02-19	WW samples	random in-hive	Late	0.0197894	-1.70357			31.1973	1	<.0001
2016-02-19	WW samples	random in-hive	Late	0.0164401	-1.7841
2016-02-19	WW samples	random in-hive	Late

## Sheet: Catalase
Anderson and Maes 2021, Gut and Colony Microbiota of Honey Bees Overwinter: Longevity Phenotypes, Social Immunity and Opportunistic Disease.
Table S4. Catalase expression in the hypopharyngeal gland overwinter
Day month year	Sample set	Marked or random	Early/Mid/Late Winter	Normalized Cat Expression	log(Norm Cat Exp)
2015-12-22	KA samples	19 Days old	Early	0.147337	-0.831688				KA samples											CW samples									WW samples
2015-12-22	KA samples	19 Days old	Early	0.0398341	-1.39975
2015-12-22	KA samples	19 Days old	Early	0.0788185	-1.10337				Oneway Analysis of log(Norm Cat Exp) By Season											Oneway Analysis of log(Norm Cat Exp) By Season Location=CW samples									Oneway Analysis of log(Norm Cat Exp) By Season Location=SRER, AZ
2015-12-22	KA samples	19 Days old	Early	0.0189311	-1.72282
2015-12-22	KA samples	19 Days old	Early	0.0537899	-1.2693
2015-12-22	KA samples	19 Days old	Early	0.0497447	-1.30325
2015-12-22	KA samples	19 Days old	Early	0.047669	-1.32176				Quantiles											Quantiles									Quantiles
2015-12-22	KA samples	19 Days old	Early	0.0395144	-1.40324
2015-12-22	KA samples	19 Days old	Early	0.00721536	-2.14174				Level	Minimum	0.1	0.25	Median	0.75	0.9	Maximum				Level	Minimum	0.1	0.25	Median	0.75	0.9	Maximum		Level	Minimum	0.1	0.25	Median	0.75	0.9	Maximum
2015-12-22	KA samples	19 Days old	Early	0.038455	-1.41505				Late	-1.91384	-1.61598	-1.35972	-1.14001	-0.98585	-0.78327	-0.52308				Late	-2.0348	-1.84738	-1.4126	-1.15965	-0.99925	-0.81762	-0.77843		Late	-1.4831	-1.45269	-1.19419	-1.11045	-0.93853	-0.82179	-0.77309
2015-12-22	KA samples	19 Days old	Early	0.12263	-0.911403				Early	-2.14174	-1.91708	-1.4121	-1.23527	-1.11217	-0.89056	-0.83169				Early	-1.86912	-1.80708	-1.46765	-1.25386	-1.12938	-0.96204	-0.92176		Early	-1.94244	-1.73102	-1.33258	-1.18154	-0.98122	-0.90962	-0.90398
2015-12-22	KA samples	19 Days old	Early	0.066363	-1.17807
2016-01-05	KA samples	33 Days old	Mid	0.0629145	-1.20125
2016-01-05	KA samples	33 Days old	Mid	0.103257	-0.986081
2016-01-05	KA samples	33 Days old	Mid	0.134985	-0.869714
2016-01-05	KA samples	33 Days old	Mid	0.0846712	-1.07226				Wilcoxon / Kruskal-Wallis Tests (Rank Sums)											Wilcoxon / Kruskal-Wallis Tests (Rank Sums)									Wilcoxon / Kruskal-Wallis Tests (Rank Sums)
2016-01-05	KA samples	33 Days old	Mid	0.0665064	-1.17714
2016-01-05	KA samples	33 Days old	Mid	0.0712254	-1.14736				Level	Count	Score Sum	Expected Score	Score Mean	(Mean-Mean0)/Std0						Level	Count	Score Sum	Expected Score	Score Mean	(Mean-Mean0)/Std0				Level	Count	Score Sum	Expected Score	Score Mean	(Mean-Mean0)/Std0
2016-01-05	KA samples	33 Days old	Mid	0.00773873	-2.11133				Late	22	570	517	25.9091	1.154						Late	18	303	288	16.8333	0.58				Late	15	271	240	18.0667	1.206
2016-01-05	KA samples	33 Days old	Mid	0.0726867	-1.13855				Early	24	511	564	21.2917	-1.154						Early	13	193	208	14.8462	-0.58				Early	16	225	256	14.0625	-1.206
2016-01-05	KA samples	33 Days old	Mid	0.0309549	-1.50927
2016-01-05	KA samples	33 Days old	Mid	0.0678766	-1.16828
2016-01-05	KA samples	33 Days old	Mid	0.0428096	-1.36846
2016-01-05	KA samples	33 Days old	Mid	0.0224754	-1.64829
2016-01-22	KA samples	50 Days old	Mid	0.0495624	-1.30485				2-Sample Test, Normal Approximation											2-Sample Test, Normal Approximation									2-Sample Test, Normal Approximation
2016-01-22	KA samples	50 Days old	Mid	0.167786	-0.775244
2016-01-22	KA samples	50 Days old	Mid	0.0472762	-1.32536				S	Z	Prob>|Z|									S	Z	Prob>|Z|							S	Z	Prob>|Z|
2016-01-22	KA samples	50 Days old	Mid	0.0947619	-1.02337				570	1.15447	0.2483									193	-0.58046	0.5616							271	1.20562	0.228
2016-01-22	KA samples	50 Days old	Mid	0.157756	-0.802013
2016-01-22	KA samples	50 Days old	Mid	0.046232	-1.33506
2016-01-22	KA samples	50 Days old	Mid	0.0993299	-1.00292
2016-01-22	KA samples	50 Days old	Mid	0.0250978	-1.60036
2016-01-22	KA samples	50 Days old	Mid	0.299861	-0.52308				1-Way Test, ChiSquare Approximation											1-Way Test, ChiSquare Approximation									1-Way Test, ChiSquare Approximation
2016-01-22	KA samples	50 Days old	Mid	0.0577844	-1.23819
2016-01-22	KA samples	50 Days old	Mid	0.0697696	-1.15633				ChiSquare	DF	Prob>ChiSq									ChiSquare	DF	Prob>ChiSq							ChiSquare	DF	Prob>ChiSq
2016-01-22	KA samples	50 Days old	Mid	0.0543744	-1.26461				1.3583	1	0.2438									0.3606	1	0.5482							1.5016	1	0.2204
2016-02-11	KA samples	70 Days old	Late	0.023841	-1.62268
2016-02-11	KA samples	70 Days old	Late	0.0913787	-1.03915
2016-02-11	KA samples	70 Days old	Late	0.102585	-0.988917				Excluded Rows	64										Missing Rows	1
2016-02-11	KA samples	70 Days old	Late	0.105526	-0.976643
2016-02-11	KA samples	70 Days old	Late	0.0368369	-1.43372				Oneway Analysis of log(Norm Cat Exp) By Age (Days)
2016-02-11	KA samples	70 Days old	Late	0.11919	-0.923759
2016-02-11	KA samples	70 Days old	Late	0.0121943	-1.91384
2016-02-11	KA samples	70 Days old	Late	0.0779861	-1.10798
2016-02-11	KA samples	70 Days old	Late	0.0297398	-1.52666				Quantiles
2016-02-11	KA samples	70 Days old	Late	0.0752175	-1.12368
2015-10-19	CW samples	random in-hive	Early	0.0728268	-1.13771				Level	Minimum	0.1	0.25	Median	0.75	0.9	Maximum
2015-10-19	CW samples	random in-hive	Early	0.048875	-1.31091				19	-2.14174	-2.01607	-1.4121	-1.31251	-1.12205	-0.8556	-0.83169
2015-10-19	CW samples	random in-hive	Early	0.0193193	-1.71401				33	-2.11133	-1.97242	-1.47407	-1.17271	-1.08883	-0.90462	-0.86971
2015-10-19	CW samples	random in-hive	Early	0.0544876	-1.2637				50	-1.60036	-1.52077	-1.32023	-1.19726	-0.85224	-0.59873	-0.52308
2015-10-19	CW samples	random in-hive	Early	0.0696245	-1.15724				70	-1.91384	-1.88473	-1.55067	-1.11583	-0.98585	-0.92905	-0.92376
2015-10-19	CW samples	random in-hive	Early	0.0237473	-1.62439
2015-10-19	CW samples	random in-hive	Early	0.0756741	-1.12105
2015-10-19	CW samples	random in-hive	Early
2015-10-19	CW samples	random in-hive	Early	0.0557361	-1.25386
2015-10-19	CW samples	random in-hive	Early	0.119741	-0.921756				Nonparametric Comparisons For All Pairs Using Steel-Dwass Method
2015-10-19	CW samples	random in-hive	Early	0.0949573	-1.02247
2015-10-19	CW samples	random in-hive	Early	0.0135168	-1.86912				q*	Alpha
2015-10-19	CW samples	random in-hive	Early	0.0548956	-1.26046				2.56903	0.05
2016-02-10	CW samples	random in-hive	Late	0.0896753	-1.04733
2016-02-10	CW samples	random in-hive	Late	0.0449971	-1.34682
2016-02-10	CW samples	random in-hive	Late	0.0215696	-1.66616
2016-02-10	CW samples	random in-hive	Late	0.069985	-1.15499				Level	- Level	Score Mean Difference	Std Err Dif	Z	p-Value	Hodges-Lehmann	Lower CL	Upper CL
2016-02-10	CW samples	random in-hive	Late	0.166559	-0.778432				50	19	4.41667	2.88675	1.52998	0.4194	0.142779	-0.171233	0.613034	++
2016-02-10	CW samples	random in-hive	Late	0.0258475	-1.58758				33	19	2.08333	2.88675	0.72169	0.8885	0.096591	-0.326529	0.413664	++
2016-02-10	CW samples	random in-hive	Late	0.0956376	-1.01937				50	33	2.08333	2.88675	0.72169	0.8885	0.119589	-0.186812	0.566446	++
2016-02-10	CW samples	random in-hive	Late	0.0614512	-1.21147				70	33	1.375	2.78039	0.49454	0.9603	0.049027	-0.447636	0.4447	+
2016-02-10	CW samples	random in-hive	Late	0.00923001	-2.0348				70	19	0.825	2.78039	0.29672	0.9909	0.120592	-0.353376	0.426602	++
2016-02-10	CW samples	random in-hive	Late	0.0149087	-1.82656				70	50	-1.74167	2.78039	-0.62641	0.9236	-0.125308	-0.600601	0.286203	--
2016-02-10	CW samples	random in-hive	Late	0.131576	-0.880823
2016-02-10	CW samples	random in-hive	Late	0.0712616	-1.14714
2016-02-10	CW samples	random in-hive	Late	0.115108	-0.938893				Excluded Rows	64
2016-02-10	CW samples	random in-hive	Late	0.0905011	-1.04335				KA samples
2016-02-10	CW samples	random in-hive	Late	0.0523446	-1.28113
2016-02-10	CW samples	random in-hive	Late	0.0442305	-1.35428				Oneway Analysis of log(Norm Cat Exp) By Season Location=KA samples
2016-02-10	CW samples	random in-hive	Late	0.150671	-0.821969
2016-02-10	CW samples	random in-hive	Late	0.0685001	-1.16431				Quantiles
2015-11-13	WW samples	random in-hive	Early	0.124744	-0.90398
2015-11-13	WW samples	random in-hive	Early	0.0965359	-1.01531				Level	Minimum	0.1	0.25	Median	0.75	0.9	Maximum
2015-11-13	WW samples	random in-hive	Early	0.10607	-0.974407				Late	-1.91384	-1.61598	-1.35972	-1.14001	-0.98585	-0.78327	-0.52308
2015-11-13	WW samples	random in-hive	Early	0.0684177	-1.16483				Early	-2.14174	-1.91708	-1.4121	-1.23527	-1.11217	-0.89056	-0.83169
2015-11-13	WW samples	random in-hive	Early	0.12245	-0.912041
2015-11-13	WW samples	random in-hive	Early	0.0567231	-1.24624
2015-11-13	WW samples	random in-hive	Early	0.0996195	-1.00166
2015-11-13	WW samples	random in-hive	Early	0.0633501	-1.19825
2015-11-13	WW samples	random in-hive	Early	0.0426211	-1.37038				Wilcoxon / Kruskal-Wallis Tests (Rank Sums)
2015-11-13	WW samples	random in-hive	Early	0.0547788	-1.26139
2015-11-13	WW samples	random in-hive	Early	0.0472192	-1.32588				Level	Count	Score Sum	Expected Score	Score Mean	(Mean-Mean0)/Std0
2015-11-13	WW samples	random in-hive	Early	0.0228874	-1.6404				Late	22	570	517	25.9091	1.154
2015-11-13	WW samples	random in-hive	Early	0.0712872	-1.14699				Early	24	511	564	21.2917	-1.154
2015-11-13	WW samples	random in-hive	Early	0.0462578	-1.33482
2015-11-13	WW samples	random in-hive	Early	0.108158	-0.96594
2015-11-13	WW samples	random in-hive	Early	0.0114171	-1.94244
2015-11-13	WW samples	random in-hive	Early	0.0729639	-1.13689
2016-02-19	WW samples	random in-hive	Late	0.0677377	-1.16917				2-Sample Test, Normal Approximation
2016-02-19	WW samples	random in-hive	Late	0.115205	-0.93853
2016-02-19	WW samples	random in-hive	Late	0.0819406	-1.0865				S	Z	Prob>|Z|
2016-02-19	WW samples	random in-hive	Late	0.131817	-0.88003				570	1.15447	0.2483
2016-02-19	WW samples	random in-hive	Late	0.0369475	-1.43241
2016-02-19	WW samples	random in-hive	Late	0.139876	-0.854256
2016-02-19	WW samples	random in-hive	Late	0.052177	-1.28252
2016-02-19	WW samples	random in-hive	Late	0.0775444	-1.11045
2016-02-19	WW samples	random in-hive	Late	0.0639462	-1.19419				1-Way Test, ChiSquare Approximation
2016-02-19	WW samples	random in-hive	Late	0.0850052	-1.07055
2016-02-19	WW samples	random in-hive	Late	0.114171	-0.942445				ChiSquare	DF	Prob>ChiSq
2016-02-19	WW samples	random in-hive	Late	0.16862	-0.77309				1.3583	1	0.2438
2016-02-19	WW samples	random in-hive	Late	0.0328772	-1.4831
2016-02-19	WW samples	random in-hive	Late	0.0728736	-1.13743

## Sheet: Vg
Anderson and Maes 2021, Gut and Colony Microbiota of Honey Bees Overwinter: Longevity Phenotypes, Social Immunity and Opportunistic Disease.
Table S4. Vitellogenin expression in the hypopharyngeal gland overwinter
Day month year	Sample set	Marked or random	Early/Mid/Late Winter	Norm Vg Exp	log(Norm Vg Exp)
2015-12-22	KA samples	19 Days old	Early	0.000196011	-3.70772				KA samples											CW samples									WW samples
2015-12-22	KA samples	19 Days old	Early	0.00280722	-2.55172
2015-12-22	KA samples	19 Days old	Early	0.00350832	-2.4549				Oneway Analysis of log(Norm Vg Exp) By Season											Oneway Analysis of log(Norm Vg Exp) By Season									Oneway Analysis of log(Norm Vg Exp) By Season
2015-12-22	KA samples	19 Days old	Early	0.000806318	-3.09349
2015-12-22	KA samples	19 Days old	Early	0.000131377	-3.88148
2015-12-22	KA samples	19 Days old	Early	0.0439838	-1.35671
2015-12-22	KA samples	19 Days old	Early	0.00172044	-2.76436				Quantiles											Quantiles									Quantiles
2015-12-22	KA samples	19 Days old	Early	0.0470041	-1.32786
2015-12-22	KA samples	19 Days old	Early	0.000454914	-3.34207				Level	Minimum	0.1	0.25	Median	0.75	0.9	Maximum				Level	Minimum	0.1	0.25	Median	0.75	0.9	Maximum		Level	Minimum	0.1	0.25	Median	0.75	0.9	Maximum
2015-12-22	KA samples	19 Days old	Early	0.0194573	-1.71092				Early	-3.88148	-3.5249	-2.64411	-2.20684	-1.4656	-1.15424	-0.94983				Early	-4.56348	-4.24473	-3.57473	-2.91872	-1.95713	-0.38759	-0.355		Early	-2.89621	-2.89351	-2.7684	-2.49357	-1.83773	-1.60428	-1.5775
2015-12-22	KA samples	19 Days old	Early	0.0242113	-1.61598				Late	-3.35495	-3.06047	-2.56166	-1.96081	-1.41115	-1.18266	-0.23679				Late	-4.09845	-3.75745	-3.40673	-2.94956	-2.32411	-1.7897	-1.3924		Late	-4.96231	-4.77364	-3.63549	-3.38243	-2.60609	-0.48113	-0.47031
2015-12-22	KA samples	19 Days old	Early	0.00592601	-2.22724
2016-01-05	KA samples	33 Days old	Mid	0.0029476	-2.53053
2016-01-05	KA samples	33 Days old	Mid	0.00211395	-2.67491
2016-01-05	KA samples	33 Days old	Mid	0.0927521	-1.03268
2016-01-05	KA samples	33 Days old	Mid	0.0065951	-2.18078				Wilcoxon / Kruskal-Wallis Tests (Rank Sums)											Wilcoxon / Kruskal-Wallis Tests (Rank Sums)									Wilcoxon / Kruskal-Wallis Tests (Rank Sums)
2016-01-05	KA samples	33 Days old	Mid	0.112245	-0.949833
2016-01-05	KA samples	33 Days old	Mid	0.0045468	-2.34229				Level	Count	Score Sum	Expected Score	Score Mean	(Mean-Mean0)/Std0						Level	Count	Score Sum	Expected Score	Score Mean	(Mean-Mean0)/Std0				Level	Count	Score Sum	Expected Score	Score Mean	(Mean-Mean0)/Std0
2016-01-05	KA samples	33 Days old	Mid	0.0224342	-1.64909				Early	24	546	564	22.75	-0.385						Early	15	251	240	16.7333	0.415				Early	12	177	144	14.75	2
2016-01-05	KA samples	33 Days old	Mid	0.0065098	-2.18643				Late	22	535	517	24.3182	0.385						Late	16	245	256	15.3125	-0.415				Late	11	99	132	9	-2
2016-01-05	KA samples	33 Days old	Mid	0.0166023	-1.77983
2016-01-05	KA samples	33 Days old	Mid	0.00315903	-2.50045
2016-01-05	KA samples	33 Days old	Mid	0.0529913	-1.2758
2016-01-05	KA samples	33 Days old	Mid	0.0384179	-1.41547
2016-01-22	KA samples	50 Days old	Mid	0.00276936	-2.55762				2-Sample Test, Normal Approximation											2-Sample Test, Normal Approximation									2-Sample Test, Normal Approximation
2016-01-22	KA samples	50 Days old	Mid	0.0175206	-1.75645
2016-01-22	KA samples	50 Days old	Mid	0.000441621	-3.35495				S	Z	Prob>|Z|									S	Z	Prob>|Z|							S	Z	Prob>|Z|
2016-01-22	KA samples	50 Days old	Mid	0.00440591	-2.35596				535	0.38482	0.7004									251	0.41505	0.6781							99	-2.00024	0.0455
2016-01-22	KA samples	50 Days old	Mid	0.0105534	-1.97661
2016-01-22	KA samples	50 Days old	Mid	0.011837	-1.92676
2016-01-22	KA samples	50 Days old	Mid	0.01135	-1.945
2016-01-22	KA samples	50 Days old	Mid	0.579708	-0.236791
2016-01-22	KA samples	50 Days old	Mid	0.0402568	-1.39516				1-Way Test, ChiSquare Approximation											1-Way Test, ChiSquare Approximation									1-Way Test, ChiSquare Approximation
2016-01-22	KA samples	50 Days old	Mid	0.00406234	-2.39122
2016-01-22	KA samples	50 Days old	Mid	0.070772	-1.15014				ChiSquare	DF	Prob>ChiSq									ChiSquare	DF	Prob>ChiSq							ChiSquare	DF	Prob>ChiSq
2016-01-22	KA samples	50 Days old	Mid	0.026401	-1.57838				0.1567	1	0.6922									0.1891	1	0.6637							4.125	1	0.0423
2016-02-11	KA samples	70 Days old	Late	0.0551406	-1.25853
2016-02-11	KA samples	70 Days old	Late	0.0424692	-1.37193
2016-02-11	KA samples	70 Days old	Late	0.0383288	-1.41648				Excluded Rows	64
2016-02-11	KA samples	70 Days old	Late	0.00116893	-2.93221
2016-02-11	KA samples	70 Days old	Late	0.0151763	-1.81883															Missing Rows	1								Missing Rows	9
2016-02-11	KA samples	70 Days old	Late	0.00425024	-2.37159				Oneway Analysis of log(Norm Vg Exp) By Age (Days)											Excluded Rows	78								Excluded Rows	78
2016-02-11	KA samples	70 Days old	Late	0.00156947	-2.80425
2016-02-11	KA samples	70 Days old	Late	0.00266822	-2.57378
2016-02-11	KA samples	70 Days old	Late	0.00836139	-2.07772
2016-02-11	KA samples	70 Days old	Late	0.000766601	-3.11543				Quantiles
2015-10-19	CW samples	random in-hive	Early	0.000266237	-3.57473
2015-10-19	CW samples	random in-hive	Early	9.28481e-05	-4.03223				Level	Minimum	0.1	0.25	Median	0.75	0.9	Maximum
2015-10-19	CW samples	random in-hive	Early	0.028338	-1.54763				19	-3.88148	-3.82935	-3.27993	-2.50331	-1.63972	-1.33652	-1.32786
2015-10-19	CW samples	random in-hive	Early	0.0012058	-2.91872				33	-2.67491	-2.63159	-2.46091	-1.9803	-1.31071	-0.97469	-0.94983
2015-10-19	CW samples	random in-hive	Early	0.389655	-0.409319				50	-3.35495	-3.11575	-2.38241	-1.93588	-1.44097	-0.5108	-0.23679
2015-10-19	CW samples	random in-hive	Early	0.00606864	-2.21691				70	-3.11543	-3.09711	-2.83624	-2.22465	-1.40534	-1.26987	-1.25853
2015-10-19	CW samples	random in-hive	Early	0.441568	-0.355002
2015-10-19	CW samples	random in-hive	Early	0.0001	-4
2015-10-19	CW samples	random in-hive	Early
2015-10-19	CW samples	random in-hive	Early	2.73226e-05	-4.56348
2015-10-19	CW samples	random in-hive	Early	0.0062269	-2.20573				Wilcoxon / Kruskal-Wallis Tests (Rank Sums)
2015-10-19	CW samples	random in-hive	Early	0.0110376	-1.95713
2015-10-19	CW samples	random in-hive	Early	0.00118236	-2.92725				Level	Count	Score Sum	Expected Score	Score Mean	(Mean-Mean0)/Std0
2015-10-19	CW samples	random in-hive	Early	0.000561312	-3.2508				19	12	215	282	17.9167	-1.664
2015-10-19	CW samples	random in-hive	Early	0.0024295	-2.61448				33	12	331	282	27.5833	1.213
2015-10-19	CW samples	random in-hive	Early	0.00114496	-2.94121				50	12	319	282	26.5833	0.913
2016-02-10	CW samples	random in-hive	Late	0.000720658	-3.14227				70	10	216	235	21.6	-0.493
2016-02-10	CW samples	random in-hive	Late	7.97168e-05	-4.09845
2016-02-10	CW samples	random in-hive	Late	0.0026642	-2.57443
2016-02-10	CW samples	random in-hive	Late	0.00519044	-2.2848
2016-02-10	CW samples	random in-hive	Late	0.00057233	-3.24235
2016-02-10	CW samples	random in-hive	Late	0.00143159	-2.84418				1-Way Test, ChiSquare Approximation
2016-02-10	CW samples	random in-hive	Late	0.000544148	-3.26428
2016-02-10	CW samples	random in-hive	Late	0.000881179	-3.05494				ChiSquare	DF	Prob>ChiSq
2016-02-10	CW samples	random in-hive	Late	0.000351389	-3.45421				4.0204	3	0.2593
2016-02-10	CW samples	random in-hive	Late	0.00361375	-2.44204
2016-02-10	CW samples	random in-hive	Late	0.00190433	-2.72026
2016-02-10	CW samples	random in-hive	Late	0.0109654	-1.95998
2016-02-10	CW samples	random in-hive	Late	0.0405134	-1.3924
2016-02-10	CW samples	random in-hive	Late	0.0107513	-1.96854				Nonparametric Comparisons For All Pairs Using Steel-Dwass Method
2016-02-10	CW samples	random in-hive	Late	0.000327447	-3.48486
2016-02-10	CW samples	random in-hive	Late	0.00024473	-3.61131				q*	Alpha
2015-11-13	WW samples	random in-hive	Early						2.56903	0.05
2015-11-13	WW samples	random in-hive	Early	0.00169108	-2.77184
2015-11-13	WW samples	random in-hive	Early
2015-11-13	WW samples	random in-hive	Early
2015-11-13	WW samples	random in-hive	Early	0.00277402	-2.55689				Level	- Level	Score Mean Difference	Std Err Dif	Z	p-Value	Hodges-Lehmann	Lower CL	Upper CL
2015-11-13	WW samples	random in-hive	Early	0.00522861	-2.28161				33	19	5.08333	2.88675	1.76092	0.2924	0.583444	-0.42312	1.56224	++++
2015-11-13	WW samples	random in-hive	Early						50	19	4.08333	2.88675	1.41451	0.4902	0.567947	-0.42859	1.69833	++++
2015-11-13	WW samples	random in-hive	Early	0.0215403	-1.66675				70	19	1.925	2.78039	0.69235	0.9001	0.291844	-0.7556	1.39243	++
2015-11-13	WW samples	random in-hive	Early	0.0175106	-1.7567				50	33	-0.08333	2.88675	-0.02887	1	-0.02038	-0.90853	0.785618
2015-11-13	WW samples	random in-hive	Early	0.0264545	-1.5775				70	50	-2.29167	2.78039	-0.82423	0.843	-0.256482	-1.18867	0.668229	--
2015-11-13	WW samples	random in-hive	Early	0.00239494	-2.6207				70	33	-3.025	2.78039	-1.08798	0.6969	-0.306249	-1.28312	0.711698	--
2015-11-13	WW samples	random in-hive	Early	0.00174547	-2.75809
2015-11-13	WW samples	random in-hive	Early	0.0037132	-2.43025
2015-11-13	WW samples	random in-hive	Early	0.00126997	-2.89621				Excluded Rows	64
2015-11-13	WW samples	random in-hive	Early	0.00129656	-2.88721
2015-11-13	WW samples	random in-hive	Early	0.00830188	-2.08082
2016-02-19	WW samples	random in-hive	Late	9.57213e-05	-4.01899
2016-02-19	WW samples	random in-hive	Late	0.00247688	-2.60609
2016-02-19	WW samples	random in-hive	Late
2016-02-19	WW samples	random in-hive	Late	0.000373085	-3.42819
2016-02-19	WW samples	random in-hive	Late	0.298945	-0.524409
2016-02-19	WW samples	random in-hive	Late
2016-02-19	WW samples	random in-hive	Late
2016-02-19	WW samples	random in-hive	Late
2016-02-19	WW samples	random in-hive	Late	0.000774249	-3.11112
2016-02-19	WW samples	random in-hive	Late	0.338606	-0.470305
2016-02-19	WW samples	random in-hive	Late	0.00220483	-2.65662
2016-02-19	WW samples	random in-hive	Late	0.000414542	-3.38243
2016-02-19	WW samples	random in-hive	Late
2016-02-19	WW samples	random in-hive	Late	0.000376328	-3.42443
2016-02-19	WW samples	random in-hive	Late	0.000231477	-3.63549
2016-02-19	WW samples	random in-hive	Late	1.09067e-05	-4.96231
